# Supplementary material for: Strong influence of vertebrate host phylogeny on gut archaeal diversity
Source: bioRxiv or medRxiv preprint supplement (doi:10.1101/2020.11.10.376293), 2020-11-10
Supplement: Supplementary file [file media-1.pdf]

# 1 Supplemental: Strong influence of vertebrate host phylogeny on gut 2 archaeal diversity

## 3 Supplemental Materials and Methods

### 4 *Sample collection*

5 Sample collection was as described by Youngblut and colleagues (Youngblut et al.  
6 2019). Samples used in this study were collected between February 2009 and March 2014.  
7 Only fresh samples with confirmed origin from a known host species were collected. Table S1  
8 lists all dates, locations, and other relevant metadata associated with each sample. All fecal  
9 samples were collected in sterile sampling vials, transported to a laboratory and frozen within 8  
10 hours. DNA was extracted with the PowerSoil DNA Isolation Kit (MoBio Laboratories, Carlsbad,  
11 USA).

### 12 *16S rRNA gene sequencing and data processing*

13 PCR amplicons for the V4 region of the 16S rRNA gene were generated with primers  
14 arch516F-arch915R (Takai and Horikoshi 2000; Raymann et al. 2017) and were sequenced with  
15 the Illumina MiSeq 2 × 250 v2 Kit at the Max Planck Institute for Developmental Biology. DADA2  
16 (Callahan et al. 2016) was used to generate amplicon sequence variants (ASVs). Taxonomy  
17 was assigned to ASVs with the QIIME2 q2-feature-classifier (Bokulich et al. 2018) using the  
18 SILVA database (v119) (Pruesse et al. 2007). All ASVs not classified as Archaea were removed.  
19 Rarefaction analysis using alpha diversity quantified via the Vegan R package (Shannon Index;  
20 Oksanen et al. 2012)) or the iNEXT R package (Hill numbers: order = 1; (Hsieh, Ma, and Chao  
21 2016)) revealed that archaeal diversity saturated at a sampling depth of approximately 250  
22 (Figure S4). Therefore, the dataset was rarefied to this depth, with all samples lacking this depth  
23 filtered out. Due to the low prevalence of ASVs across host species (1.8% ± 23 s.d.), we did not  
24 employ the standard compositional data analysis transformation of centered log ratio (CLR),  
25 given the large number of zero values in the dataset that would need to be imputed as non-zero  
26 values prior to the transformation. We found such imputation by either using a pseudo count of  
27 1 or imputing via the Bayesian-multiplicative replacement method implemented in the  
28 zCompositions (Palarea-Albaladejo and Martín-Fernández 2015) R package generated  
29 unrealistic distributions. QIIME2 was used to calculate alpha and beta diversity. To limit  
30 saturation of star-phylogeny beta diversity measures (*i.e.*, no overlap of any ASVs across  
31 samples leading to maximum diversity values), we first aggregated ASV counts at the  
32 genus-level. A phylogeny was inferred for all ASV sequences with fasttree (Price, Dehal, and  
33 Arkin 2010) based on a multiple sequence alignment generated by mafft (Katoh and Standley  
34 2013). All samples lacking relevant metadata used in the study were filtered from the dataset. In  
35 cases where an individual host was sampled multiple times, we randomly selected one sample.

36 Samples from the 16S rRNA amplicon dataset of Youngblut and colleagues were  
37 previously sequenced and process in the same manner as done for the arch516F-arch915R  
38 amplicon dataset, with the exception that the primers 515F-806R were used and samples were  
39 rarefied to a depth of 5000 (Youngblut et al. 2019). To compare ASVs classified as Archaea in  
40 each dataset, we filtered out all non-archaeal ASVs. For our analyses of Bacteria-Archaea

41 interactions, we removed all archaeal ASVs from the 515F-806R dataset. Alpha and beta  
42 diversity were calculated as stated above on genus-level abundances.

#### 43 *Host phylogeny*

44 Only 21% of animals in our dataset have existing genome assemblies of any quality in  
45 which to infer a genome-based phylogeny from. Instead, we used a dated host phylogeny for all  
46 species from <http://timetree.org> (Kumar et al. 2017). We created a phylogeny for all samples by  
47 grafting sample-level tips into each species node with a negligible branch length (Figure S5).

#### 48 *Intra-species sensitivity analysis*

49 The dataset consisted of a differing number of samples per host species and no  
50 intra-species phylogenetic relatedness data. Instead of just randomly subsampling one sample  
51 per species or using branches of zero length for phylogeny-based hypothesis testing, we  
52 instead employed a sensitivity analysis to assess robustness to intra-species variability. The  
53 sensitivity analysis was performed as described in Youngblut and colleagues (Youngblut et al.  
54 2019). Briefly, for each hypothesis test, we generated 100 permutation datasets in which one  
55 sample was randomly selected per species. A hypothesis test was considered robustly  
56 significant if >95% of the permutation datasets generated a significant result ( $P < 0.05$  unless  
57 otherwise noted).

#### 58 *Data analysis*

59 We used BLASTn (Camacho et al. 2009) to assess similarity of ASVs to cultured  
60 representatives in the SILVA All Species Living Tree database (Quast et al. 2013), with an  
61 E-value cutoff of  $<1e-5$ . All BLAST hits with an alignment length  $<95\%$  of the query sequence  
62 length were filtered out.

63 Multiple regression on matrices (MRM) was performed with the Ecodist R package  
64 (Goslee and Urban 2007). We used rank-based correlations and 999 permutations to ascertain  
65 test significance. Regression variables that were not inherently distance matrices were  
66 converted via various means. Gower distance was used to convert detailed diet data, detailed  
67 habitat data, and “technical” data (*i.e.*, captive/wild animal and feces/gut-contents sample type)  
68 to distance matrices. Geographic distance was calculated as Great Circle distance based on  
69 sample latitude and longitude. Alpha diversity was converted to a Euclidean distance matrix.  
70 Principal coordinate analysis (PCoA) ordinations were generated for each beta diversity  
71 measure via the Vegan R package (Oksanen et al. 2012).

72 Pagel's  $\lambda$  and the local indicator of phylogenetic association (LIPA) were calculated via  
73 the PhyloSignal R package (Keck et al. 2016), with 999 and 9999 permutations used,  
74 respectively. We tested for cophylogeny with the Procrustes Application to Cophylogenetic  
75 Analysis (PACo) and ParaFit, implemented in the PACo (Hutchinson et al. 2017) and APE  
76 (Paradis, Claude, and Strimmer 2004) R packages, respectively. For both tests, the Cailliez  
77 correction (Cailliez 1983) for negative eigenvalues was applied, and 999 permutations were  
78 used to assess significance. Tests of trait associations were performed with phylogenetic  
79 generalized least squares (PGLS) and randomization of residuals in a permutation procedure



80 (RRPP), implemented in the phytools and RRPP packages (Collyer and Adams 2018),  
81 respectively. To ascertain significance, 999 permutations were used for both methods.

82 Ancestral state reconstruction models were fit to archaeal taxon abundances (extant  
83 traits) via the phylopars method as implemented in the Rphylopars package (Goolsby,  
84 Bruggeman, and Ané 2017). The method incorporates intra-species trait variation, so all  
85 samples were used instead of employing an intra-species sensitivity analysis (see above). We  
86 first compared log-likelihoods of four different models: Brownian Motion, Ornstein-Uhlenbeck,  
87 Early-Burst, and Star-Phylogeny. Brownian Motion and Ornstein-Uhlenbeck models had the  
88 best log-likelihoods for class- and genus-level archaeal abundances, respectively. Predicted trait  
89 values were visualized on the host phylogeny via the Phytools R package.

90 Tables S6 and S7 list published body temperature and methane emission data used in  
91 this study.

92 Significant patterns of Archaea-Archaea and Archaea-Bacteria co-occurrence were  
93 inferred via the cooccur R package (Griffith, Veech, and Marsh 2016). Subnetworks in each  
94 co-occurrence network were identified with the walktrap algorithm (Pons and Latapy 2005).

95 General data manipulation and visualization was performed in R (R Core Team 2020)  
96 with the following R packages: dplyr, tidyr, and ggplot2 (Wickham 2009). Phylogenies were  
97 manipulated and visualized with the APE and phytools R packages and with iTOL (Letunic and  
98 Bork 2016). Networks were manipulated and visualized with the igraph (Csardi and Nepusz  
99 2006), tidygraph (Pedersen 2018b), and ggraph (Pedersen 2018a) R packages. High  
100 performance computing cluster job submission was performed via the batchtools (Lang, Bischl,  
101 and Surmann 2017) and clustermq (Schubert 2019) R packages. For ASV-specific tests (*e.g.*,  
102 LIPA, PGLS, and co-occurrence), only ASVs present in >5% of samples were included. Multiple  
103 hypothesis testing was corrected via the Benjamini-Hochberg procedure.

## 104 **Supplemental Results**

### 105 *Prevalence and diversity of Archaea across vertebrate clades*

106 Of 311 genomic DNA samples from 5 vertebrate taxonomic classes, 185 (60%) passed  
107 16S rRNA PCR amplification, MiSeq sequencing, and sequence data quality control (Table S2).  
108 Success rates were highest for Reptilia (73%) and Aves (67%), 58% for Mammalia, 50% for  
109 Amphibia, and 50% for Reptilia (Figure S2). The 185 successful samples comprised mostly wild  
110 individuals (76%) and a total of 110 species, with a mean  $1.7 \pm 4.3$  s.d. samples per species  
111 (Figure S1). Mammalia made up the majority of samples (72%); still, non-mammalian samples  
112 spanned 22 families and 35 genera. In regards to diet, success rates were 70, 56, and 46% for  
113 herbivores, omnivores, and carnivores, respectively (Figure S2). Feces samples had a  
114 substantially higher success rate (62%) versus gut contents (38%), but there was little  
115 difference between wild and captive individuals (62 versus 56%, respectively). The mean  
116 per-species success rate was  $61\% \pm 49$  s.d., and when just assessing species with >1 sample  
117 (72 of 158), the success rate was  $63\% \pm 37.3$  s.d. Plotting the number of successful and failed  
118 samples onto a phylogeny of all species showed that success often varied among individuals of  
119 a species (Figure S3). In addition, some phylogenetic clustering of success rates could be  
120 observed. Indeed, when just considering mammalia, which made up the majority of samples

121 (73%), the orders Lagomorpha, Carnivora, and Rodentia had the lowest success rates (<50%  
122 for each), while success rates were 100% for Monotremata, Perissodactyla, and Proboscidea  
123 (Figure S2). While these findings are compelling, one must consider that failure may have  
124 resulted from many phenomena besides absence of Archaea from the gut, such as PCR  
125 inhibitors or insufficient DNA for effective amplification. Still, success across highly varied host  
126 taxonomic groups, diets, and sample types indicates that Archaea are widespread among  
127 vertebrates, regardless of diet.

128 Rarefaction analysis using the Shannon index revealed that archaeal diversity saturated  
129 at a low sampling depth of approximately 250 sequences, regardless of the host class (Figure  
130 S4). We confirmed these results with another rarefaction method that extrapolates diversity  
131 beyond obtained sampling depths, with diversity based on Hill numbers (Figure S4). These  
132 results contrast most gut microbiome studies using the commonly used “universal” Earth  
133 Microbiome 16S rRNA primer set 515F-806R, in which bacterial and archaeal diversity is  
134 usually not saturated for the sampling depths reached (Walters et al. 2016; Thompson et al.  
135 2017; Youngblut et al. 2019).

136 The dataset comprised 1891 amplicon sequence variants (ASVs), with a rather diverse  
137 taxonomic composition for Archaea, comprising 6 phyla (Asgardaeota, Crenarchaeota,  
138 Diapherotrites, Euryarchaeota, Nanoarchaeaeota, Thaumarchaeota) and 10 classes (Figure 1).  
139 Class-level taxonomic compositions were fairly consistent among individuals of each host  
140 species (Figure S5; Table S3). We note that Asgardarchaeota and Diapherotrites were each  
141 only represented by 1 ASV, and each were found in only 1 species: Asgardaeota in the the  
142 European Otter (*Lutra lutra*) and Diapherotrites in the Smooth Newt (*Lissotriton vulgaris*).  
143 Neither clade is known to be animal-associated (Borrel et al. 2020). Also, the Thermococci class  
144 (Euryarchaeota phylum) comprised only 2 ASVs, with one only found in the Common Carp  
145 (*Cyprinus carpio*) and the other in the European Otter. Both ASVs were classified as  
146 Methanofastidiosales, with one identified as Methanofastidiosum. No member of this class is  
147 known to be host-associated (Söllinger and Urich 2019; Borrel et al. 2020). Plotting mean  
148 abundances of taxonomic classes onto a tree of all species revealed that Methanobacteria  
149 (Euryarchaeota phylum) dominated in many species, but dramatically different microbiome  
150 compositions were observed scattered across the phylogeny. For instance, Thermoplasmata  
151 (Euryarchaeota phylum) dominated in multiple non-human primates, while two Mammalia and  
152 one Aves species were nearly completely comprised of Nitrososphaeria (Thaumarchaeota  
153 phylum): the European badger (*Meles meles*), the Western European Hedgehog (*Erinaceus*  
154 *europaeus*), and the Rook (*Corvus frugilegus*). Halobacteria (Euryarchaeota phylum)  
155 dominated the Goose (*Anser anser*) microbiome, which were all sampled from salt marshes.  
156 The class was also noticeably present in some distantly related animals inhabiting high salinity  
157 biomes (e.g., the Nile Crocodile and the Short Beaked Echidna; Tables S1 & S3).  
158 Bathyarchaeia, a class in the Crenarchaea phylum according to the SILVA database taxonomy  
159 but also known as the Candidatus Bathyarchaeota phylum, are not known to inhabit the  
160 vertebrate gut (Borrel et al. 2020); however, we observed a total of 9 Bathyarchaeia ASVs in 8  
161 samples, comprising 6 species spanning 4 taxonomic classes (all except Mammalia; Table S4).  
162 The total relative abundance was <0.5% in 4 of the species, while substantially higher (3.3%) in  
163 the Nile Crocodile (*Crocodylus niloticus*), and quite abundant in 2 Smooth Newt samples (17.9  
164 and 42.2%).

165 Only 40% of ASVs had a  $\geq 97\%$  sequence identity match (a pseudo-species level) to any  
166 cultured representative in the All Species Living Tree database (Figure S6A). Of the 10  
167 taxonomic classes represented by all ASVs, 5 had no match at  $\geq 85\%$  sequence identity:  
168 Odinarchaeia, Bathyarchaeia, Iainarchaeia, Woesarchaeia, and Thermococci. Taxonomic  
169 novelty to cultured representatives differed substantially among the other 5 classes (Figure  
170 S6B); only Methanobacteria had  $>50\%$  ASVs with a species-level match (52%), while  $<20\%$  of  
171 ASVs belonging to Thermoplasmata and Nitrososphaeria had such a match. These findings  
172 suggest that our dataset consists of a great deal of uncultured taxonomic diversity.

### 173 *Archaea-targeting primers reveal much greater archaeal diversity*

174 We compared the archaeal diversity identified with the archaeal-targeting primers  
175 (“16S-arc”) used in this study to the standard “universal” 16S rRNA primers (“16S-uni”) used by  
176 Youngblut and colleagues on many of the same samples (Youngblut et al. 2019). Importantly,  
177 both datasets were processed in the same manner (see Methods). A total of 140 samples  
178 overlapped between the two datasets, with the majority of species (77%) consisting of  
179 mammals, but all 5 classes were represented (Figure S7). The 16S-uni primers generated a  
180 total of 169 ASVs, which is only 12.1% of archaeal ASVs generated by the 16S-arc primers for  
181 the same samples. All archaeal classes except the Soil Crenarchaeal Group were substantially  
182 more represented in the 16S-arc dataset, with 6 classes completely absent from the 16S-uni  
183 dataset: Nitrososphaeria, Woesarchaeia, unclassified Eukyarchaeota, Iainarchaeia,  
184 Bathyarchaeia, and Odinarchaeia. Besides the Soil Crenarchaeal Group, class-level prevalence  
185 across host species was substantially higher across hosts when grouped by taxonomic class or  
186 diet (Figure S7). For example, Methanobacteria was observed in all host species via the  
187 16S-arc primers, while prevalence dropped substantially for 16S-uni primers (e.g., only 9% for  
188 Aves). These findings show that the “universal” NGS 16S rRNA primers used for most  
189 microbiome studies can substantially undersample archaeal diversity, as previously observed  
190 (Raymann et al. 2017; Koskinen et al. 2017; Pausan et al. 2019)

### 191 *Host diet and evolutionary history explain various aspects of archaeal diversity*

192 We used multiple regression on matrices (MRM) to assess which potential factors  
193 explain archaeal beta diversity. We employed this approach because archaeal beta diversity,  
194 host phylogenetic relatedness, and geographic distance can be inherently represented as  
195 distance matrices, while distances can be calculated for other explanatory factors such as  
196 similarity of detailed diet compositions (see Methods). Due to a lack of within-species  
197 phylogenetic relatedness data, we used one individual per host species and assessed  
198 intra-species variation by repeating the analysis 99 more times, each time with one randomly  
199 selected individual per species. Unless otherwise noted, this permutation-based intra-species  
200 sensitivity analysis was used for all hypothesis testing.

201 Geographic distance, habitat, and technical components (e.g., feces versus gut  
202 contents) did not significantly explain beta diversity, regardless of the diversity metric (Figure  
203 2A). Host phylogeny significantly explained diversity as measured by unweighted UniFrac, Bray  
204 Curtis, and Jaccard; however, significance was not quite reached for weighted UniFrac. The  
205 percent variation explained was dependent on the beta diversity measure and varied from  $\sim 28\%$

206 for Jaccard to ~12% for unweighted UniFrac. In contrast to host phylogeny, diet was only  
207 explanatory for Bray-Curtis, with ~12% of variance explained. Mapping the major factors onto  
208 ordinations qualitatively supported our results (Figure S8). Applying the same MRM analysis to  
209 just non-mammalian species did not generate any significant associations between host  
210 phylogeny or diet (Figure S9), likely due to the low sample sizes ( $n = 39$ ). However, host  
211 phylogeny did have comparable coefficients as when including all species and were nearly  
212 significant for both the Bray-Curtis and Jaccard indices, while diet showed no such trend  
213 towards significance. These findings suggest that host evolutionary history mediates vertebrate  
214 gut archaeal diversity more than diet, with diet mainly altering the abundances of archaeal ASVs  
215 shared by various hosts, while host phylogeny also alters the composition of archaeal taxa.

216 We also assessed alpha diversity via MRM in order to provide a consistent comparison  
217 to our beta diversity assessment, with alpha diversity represented here as a euclidean distance  
218 matrix (Figure S10). In contrast to beta diversity, no factors significantly explained alpha  
219 diversity calculated via either the Shannon Index or Faith's Phylogenetic Diversity (Faith's PD).  
220 Of note, geographic distance nearly significantly explained Shannon Index diversity ( $P = 0.06$ ),  
221 while the same was true of habitat for Faith's PD ( $P = 0.16$ ).

#### 222 *A signal of Archaea-Vertebrata co-phylogeny*

223 To test for corresponding phylogenetic associations on both the host phylogeny and the  
224 archaeal 16S rRNA phylogeny, we employed two approaches to quantify signals of  
225 co-phylogeny: Procrustes Application to Cophylogenetic Analysis (PACo) and ParaFit (Paradis,  
226 Claude, and Strimmer 2004; Hutchinson et al. 2017). Both PACo and ParaFit tests were both  
227 significant ( $P < 0.01$ ) for each of the 100 permutations of subsampling one individual per host  
228 species, indicating a signal of co-phylogeny that is robust to intra-species microbiome variation.  
229 We investigated which host species showed the strongest signal of cophylogeny by assessing  
230 the distribution of PACo Procrustes residuals, which provide an indication of local congruence  
231 between phylogenies (lower residuals indicate a stronger congruence). Mammalia showed a  
232 substantially stronger association relative to the other four classes (Figure 2D), with residuals  
233 decreasing in the order of Actinopterygii > Amphibia > Reptilia > Aves » Mammalia, and these  
234 differences were significant (Kruskal-Wallis  $< 0.01$ ; pairwise Wilcox  $< 0.01$  for all). In regards to  
235 diet, residuals were significantly lower for herbivores relative to omnivores and carnivores  
236 (Wilcox,  $P < 0.0001$ ), while carnivores and omnivores did not significantly differ (Figure 2E).

#### 237 *Specific archaeal ASVs are associated with host phylogeny*

238 Given the evidence of host phylogeny explaining aspects of archaeal gut microbiome  
239 diversity, we sought to further resolve this association by testing whether archaeal taxon  
240 abundance is clustered on the host phylogeny. We found 37 ASVs to show significant global  
241 phylogenetic signal (Pagel's  $\lambda$ , adj.  $P < 0.05$ ) spanning three phyla: Euryarchaota,  
242 Thaumarchaeota, and Crenarchaeota (Figure 2C). The clade with the highest number of  
243 significant ASVs ( $n = 15$ ) was Methanobacteriaceae, followed by Nitrososphaeraceae ( $n = 12$ ),  
244 and Methanocorpusculaceae ( $n = 5$ ). While lambda coefficients varied across ASVs, most  
245 showed a very strong association (Pagel's  $\lambda > 0.9$ ), with major exceptions being a  
246 Methanosarcinaceae ASVs and an unclassified Methanomicrobia ASV (Figure 2C).

247 We next tested for local phylogenetic signals to resolve archaeal taxon specificities for  
248 particular host clades. We used the local indicator of phylogenetic association (LIPA) and found  
249 25 ASVs to have significant associations with certain host clades. Mapping significant  
250 associations on the host phylogeny revealed that clade-specificity was generally shallow and  
251 often spanned only 2 species (Figure S12). For instance, 4 Nitrososphaeraceae ASVs were  
252 associated with 2 snake species (*Zamenis longissimus* and *Natrix natrix*), 3 Methanobrevibacter  
253 ASVs were associated with 2 species of kangaroo (*Macropus giganteus* and *Macropus*  
254 *fuliginosus*), and a Methanocorpusculum ASV was associated with both camel species  
255 (*Camelus dromedarius* and *Camelus bactrianus*). The 2 major exceptions to this trend were the  
256 Methanothermobacter ASVs, which associated with many species of Aves, while the  
257 Methanobrevibacter and Methanosphaera ASVs associated with many Artiodactyla species  
258 (true ruminants; Figures S12). Summarizing the number microbe-host clade associations  
259 revealed clear partitioning of archaeal taxa by host clade, except for Methanobrevibacter, for  
260 which at least one ASV was associated with each host order for which any phylogenetic signal  
261 was observed ( $n = 23$ ; Figure S12B). Altogether, these results help to resolve which particular  
262 archaeal clades are most strongly associated with host evolutionary history.

263 We also tested for phylogenetic signal of alpha diversity but found no significant global  
264 associations when measuring diversity via the Shannon Index or Faith's PD ( $P > 0.05$ ) and no  
265 local associations (adj.  $P > 0.05$ ). These findings correspond with our MRM analysis of alpha  
266 diversity in that host phylogenetic relatedness does not seem to correspond with total archaeal  
267 diversity in the gut.

#### 268 *Specific methanogen ASVs are associated with diet*

269 We used two methods to resolve the specific effects of diet on the archaeal microbiome  
270 while controlling for host evolutionary history: phylogenetic generalized least squares (PGLS)  
271 and randomization of residuals in a permutation procedure (RRPP). The former is a common  
272 test for association between traits while controlling for phylogenetic relatedness, while the latter  
273 can exhibit higher statistical power while minimizing false positives (Revell 2010; Collyer and  
274 Adams 2018). PGLS identified 10 ASVs as being significantly associated with diet (adj.  $P <$   
275  $0.05$ ; Figure S11). All ASVs belonged to the Euryarchaeota phylum, and comprised 4 genera:  
276 Methanobrevibacter, Methanosphaera, Methanothermobacter, and candidatus  
277 Methanomethylophilus. The RRPP analysis identified the same 10 ASVs along with 5 more that  
278 belonged to the same genera (Figure 2B). We used the RRPP models to predict ASV  
279 abundances with 95% confidence intervals (CIs) for each diet in order to determine diet-specific  
280 enrichment. Methanobacteria ASVs differed in their responses to diet, with 5 being most  
281 abundant in herbivores, while the other 6 were more abundant in omnivores/carnivores (Figure  
282 2B). Notably, diet enrichment differed even among ASVs belonging to the same genus. In  
283 contrast to the Methanobacteria ASVs, all 4 Methanomethylophilus ASVs were predicted as  
284 more abundant in omnivores/carnivores. These findings suggest that diet influences the  
285 abundances of particular ASVs, and even closely related ASVs can have contrasting  
286 associations to diet. All significant ASVs were methanogens, which may be due to the species  
287 studied (e.g., a mammalian bias) or possibly because certain methanogens respond readily to  
288 diet, possibly due to syntrophic associations with diet-specific bacteria.



289 When applied to alpha or beta diversity, neither PGLS nor RRPP identified any  
290 significant associations with diet after accounting for host phylogenetic relatedness. These  
291 findings correspond with our MRM analyses by indicating that diet is not a strong modulator of  
292 overall archaeal diversity in the vertebrate gut, although certain ASVs do seem to be  
293 substantially affected (Figures 2B & S11).

#### 294 *Evidence of widespread Methanobacteria presence in the ancestral vertebrate gut*

295 We utilized ancestral state reconstruction (ASR) to investigate which archaeal clades  
296 were likely present in the ancestral vertebrate gut. Traits were defined as archaeal taxon  
297 abundances. Notably, we used a method that incorporated intra-species trait variance, allowing  
298 us to directly utilize the entire host dataset for the reconstruction (see Methods). Our model for  
299 predicting class-level abundances was overall quite accurate at extant species trait prediction  
300 (adj.  $R^2 = 0.86$ ,  $P < 2e-16$ ; Figure S14). However, predictions were not accurate for 2 of the 6  
301 classes (Halobacteria and Nitrososphaeria,  $P > 0.1$ ), likely due to low prevalence across extant  
302 host species (Figures 2 & S15). Excluding the poorly predicted classes, the 95% CIs for  
303 predicted abundances were constrained enough to be informative (mean of 26 %  $\pm$  29 s.d.)  
304 across extant and ancestral host species. The model revealed that Methanobacteria was  
305 uniquely pervasive across ancestral nodes, while other classes were sparsely distributed among  
306 extant taxa and across a few, more recent ancestral nodes (Figures 2 & S15). Moreover, the  
307 model predicted that Methanobacteria was the only class to be present in the last common  
308 ancestor (LCA) of all mammals and the LCA of all 5 host taxonomic classes (Figure 3B & 3C).

309 We also generated an ASR model for genus-level abundances of all genera in the  
310 Methanobacteria class in order to resolve the association between Methanobacteria clades and  
311 the ancestral vertebrate gut. Our model was somewhat more accurate at predicting extant traits  
312 than our class-level model ( $R^2 = 0.93$ ,  $P < 2e-16$ ; Figure S14), and all 4 genera were accurately  
313 predicted ( $P < 5.5e-10$  for all). Predicted trait value 95% CIs were again informative (mean of 28  
314  $\pm$  24 s.d.). The model predicted 3 of the 4 genera to be present in the LCA of all mammals and  
315 the LCA of all host species (Figure 3F & 3G). Of the 3, Methanobrevibacter and  
316 Methanothermobacter were predicted to have similar abundances for both LCAs (~30-35%),  
317 while Methanosphaera was much lower (~5%). Mapping predicted abundances onto the host  
318 phylogeny revealed that Methanobrevibacter was predicted as most highly abundant in the  
319 Artiodactyla and generally abundant across most Mammalia clades (Figure S16). In contrast,  
320 Methanothermobacter was predicted to be most highly abundant and prevalent across the Aves  
321 and also mammalian clades in which Methanobrevibacter was less abundant (e.g., Carnivora  
322 and Rodentia). Methanosphaera was predicted to be prevalent across most animal clades, but  
323 generally at low abundance.

#### 324 *Methanothermobacter abundance is correlated with body temperature*

325 Methanothermobacter is not known to be host-associated (Borrel et al. 2020); still, we  
326 observed a total of 39 Methanothermobacter ASVs spanning 78 samples (mean of 18  $\pm$  30 s.d.  
327 samples per ASV), which strongly suggests that its presence is not due to contamination.  
328 Moreover, the top BLASTn hit for 36 of the 39 ASVs was to a cultured Methanothermobacter

329 strain (Figure S17, Table S5), including the top 15 most abundant ASVs, which indicates that  
330 the taxonomic annotations are demonstrably correct.

331 The high prevalence of Methanothermobacter among Aves lead us to the hypothesis  
332 that body temperature significantly affects the distribution Methanothermobacter (Figure S18),  
333 given that birds generally have higher body temperatures than mammals (Clarke and O'Connor  
334 2014) and all existing Methanothermobacter cultures are thermophiles (Bonin and Boone 2006).  
335 Moreover, Methanothermobacter is not abundant in Monotremata and Marsupialia species  
336 relative to the placental groups, which reflects a lower body temperature in the latter clades  
337 (Figure S18). We were able to assign published body temperature data to 73 mammalian and  
338 avian species (Figure S19A & S19B; Table S6). Genus-level abundances of  
339 Methanothermobacter significantly correlated with body temperature (RRPP, adj.  $P < 0.001$ ),  
340 while Methanobrevibacter and Methanosphaera did not (Figures S19C & S19D). However, the  
341 association was only significant if not accounting for host phylogeny (RRPP, adj.  $P > 0.05$ ),  
342 indicating that the association between Methanothermobacter and body temperature could not  
343 be decoupled from host evolutionary history. We also identified 7 Methanothermobacter ASVs that  
344 be correlated with body temperature (RRPP, adj.  $P < 0.05$ ; Figure S19E), while no  
345 Methanobrevibacter or Methanosphaera ASVs were correlated. Again, the association was only  
346 significant if not accounting for host phylogeny. Regardless, we provide evidence congruent with  
347 the hypothesis that Methanothermobacter abundance is modulated by host body temperature  
348 and is thus rather highly abundant in birds and various placental mammal clades.

349 We note that among the host species in which methane emission data exists (Hackstein  
350 and van Alen 1996; Clauss et al. 2020), avian species with high abundances of  
351 Methanothermobacter have emission rates on the higher end of mammal emission rates (Figure  
352 S20), suggesting that Methanothermobacter is indeed a persistent inhabitant in the gut of some  
353 avian species.

#### 354 *Microbe-microbe interactions modulating archaeal diversity*

355 Besides host-specific factors potentially modulating diversity, microbe-microbe  
356 interactions may also play a significant role. We first tested for solely archaeal interactions by  
357 inferring instances of co-occurrence among archaeal ASVs. The co-occurrence network  
358 contained clearly defined subnetworks, with few significant positive associations between them  
359 (Figure S22), especially for the largest 6 subnetworks (Figure S21). The only significant  
360 negative co-occurrences were between Subnetwork 1, which was dominated by  
361 Methanobrevibacter, and Subnetwork 4, which was dominated by Methanothermobacter. These  
362 2 subnetworks differed substantially in their distributions across host clades, with Subnetwork 1  
363 ASVs only highly prevalent among Artiodactyla, while Subnetwork 4 ASVs were highly prevalent  
364 across a number of mammalian orders (*e.g.*, Carnivora and Rodentia) and almost all avian  
365 orders (Figure S23). Among subnetworks, ASV taxonomy was highly homogeneous. Indeed, we  
366 found ASVs to significantly and strongly associated with those of the same clade versus from  
367 other clades, regardless of taxonomic level (Figure S21C), although assortativity by taxonomic  
368 affiliation substantially dropped between the family and genus levels.

369 We investigated potential diet-specific archaea-archaea interactions by separately  
370 testing for co-occurrences across samples of each diet (Figure S24). The number of significant  
371 co-occurrences dropped from herbivores ( $n = 560$ ) to omnivores ( $n = 134$ ) to carnivores ( $n =$

372 81). In contrast, assortativity by taxonomic group was generally lowest for omnivores and  
373 highest for carnivores, regardless of taxonomic level. These findings suggest that the carnivore  
374 gut is composed of simpler and more taxonomically homogenous archaeal consortia relative to  
375 omnivores and herbivores.

376 We also assessed Bacteria-Archaea interactions by utilizing the overlapping 16S-uni  
377 dataset samples from Youngblut and colleagues (Youngblut et al. 2019). Prior to merging the  
378 datasets, we removed all archaeal ASVs from the 16S-uni dataset. Archaeal and bacterial alpha  
379 diversity were not correlated, regardless of measuring diversity via the Shannon Index or Faith's  
380 PD (Pearson,  $P > 0.05$ ; Figure 4). Moreover, archaeal and bacterial beta diversity were not  
381 correlated (Mantel,  $P > 0.05$ ; Procrustes superimposition,  $P > 0.05$ ), regardless of the measure:  
382 Bray-Curtis, Jaccard, and weighted/unweighted UniFrac. These results suggest that archaeal  
383 diversity is not explained by bacterial diversity nor vice versa.

384 Inferring a co-occurrence network of bacterial and archaeal ASVs revealed a large  
385 number of significant co-occurrences ( $n = 3018$ ; Figure 4); all of which were positive.  
386 Bacteria-Archaea and Archaea-Archaea associations comprised 13.1 and 6.1% of the network  
387 edges, respectively. While overall network taxonomic assortativity was low, assortativity of just  
388 Archaea was quite high ( $\geq 0.774$  for all taxonomic levels). The entire network comprised 5  
389 subnetworks, but only 2 included archaea: one of which included only *Methanobrevibacter*  
390 ASVs, while the other was dominated by *Methanothermobacter* ASVs. The  
391 *Methanobrevibacter*-only subnetwork also comprised 13 bacterial families from 3 phyla.  
392 Firmicutes dominated among the bacterial ASVs (87%), with Bacteroidetes as a distant second  
393 (11%). The most represented bacterial families in the network were Ruminococcaceae (46%),  
394 Lachnospiraceae (13%), and Christensenellaceae (11%), which are known include hydrogen  
395 generating species that often occur with *Methanobrevibacter* (Hansen et al. 2011; Goodrich et  
396 al. 2014; Borrel et al. 2020). The *Methanothermobacter*-dominated subnetwork included much  
397 less bacterial diversity, with only 3 families: Burkholderiaceae (Proteobacteria phylum);  
398 Enterococcaceae and Clostridiaceae 1 (Firmicutes phylum). These findings indicate that a  
399 subset of archaeal ASVs co-occur with specific bacterial ASVs in each of the 2 consortia: the  
400 *Methanothermobacter*-dominant consortium most prevalent among birds and the  
401 *Methanobrevibacter*-dominant consortium most prevalent among ruminants and various other  
402 plant-consuming mammals (Figure S18). While only methanogens were observed to co-occur  
403 with bacteria, this may be due to the mammalian bias of the dataset, given that prevalence of  
404 non-methanogenic archaea is lower among mammals relative to other vertebrate classes  
405 (Figure 1).

406 **Supplemental Tables**

407 **Table S1.** All relevant metadata for all samples in the 16S rRNA amplicon dataset.

408 **Table S2.** Metadata for all samples in which Archaea-targeted 16S rRNA amplicon library  
409 preparation and sequencing was attempted ( $n = 311$ ) and the samples that passed all quality  
410 control measures ( $n = 185$ ).

411 **Table S3.** Percent relative abundance of each archaeal taxonomic class in each sample ( $n =$   
412  $185$ ). Classes are labeled as “Phylum;Class”.

413 **Table S4.** Genus-level percent relative abundances of Bathyarchaeia in all samples where the  
414 clade was detected.

415 **Table S5.** The top 5 BLASTn hits of all Methanothermobacter ASV sequences to the All Species  
416 Living Tree dataset (see Methods). Mean percent relative abundances across all samples and  
417 samples grouped by host taxonomic class are also provided.

418 **Table S6.** Publicly available body temperature data used in this study. If multiple temperature  
419 data points per species were available, the mean temperature was used. The datasets include  
420 “Clarke2010” (Clarke, Rothery, and Isaac 2010), “Clarke2014” (Clarke and O’Connor 2014),  
421 “McNab1966” (McNab 1966), “Prinzinger1991” (Prinzinger, Preßmar, and Schleucher 1991),  
422 “Riek2013” (Riek and Geiser 2013), “Sieg2009” (Sieg et al. 2009), and “Teare2002” (Teare  
423 2002). “No match” indicates the species lacking a match to any of the body temperature  
424 datasets; these species were not included in any analyses of body temperature due to a lack of  
425 data.

426 **Table S7.** Publicly available animal methane emission data used in this study. The studies  
427 comprise “Hackstein\_1996” (Hackstein and van Alen 1996) and “Clauss\_2020” (Clauss et al.  
428 2020).

429 **Supplemental Figures**

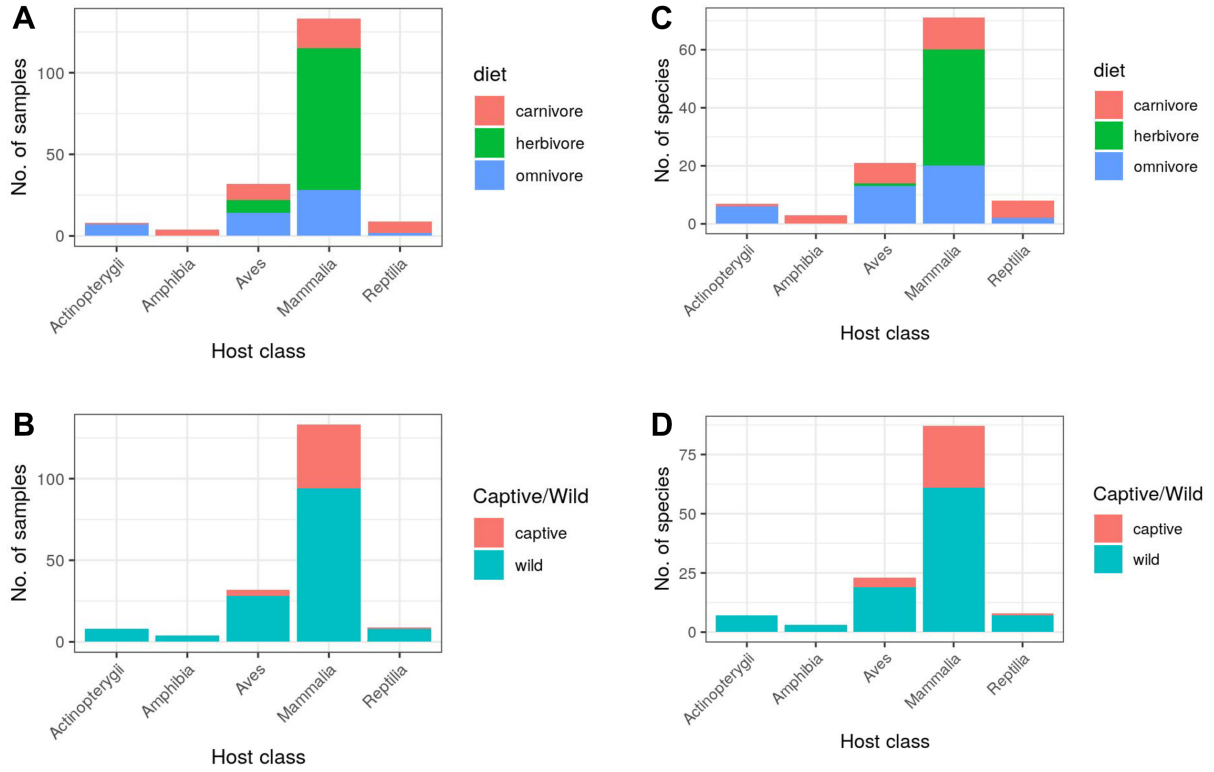

430 **Figure S1.** The number of samples (A & B) or host species (C & D) in the final sequence  
 431 dataset, grouped by host class, host diet (A & C) or host captive/wild status (B & D).



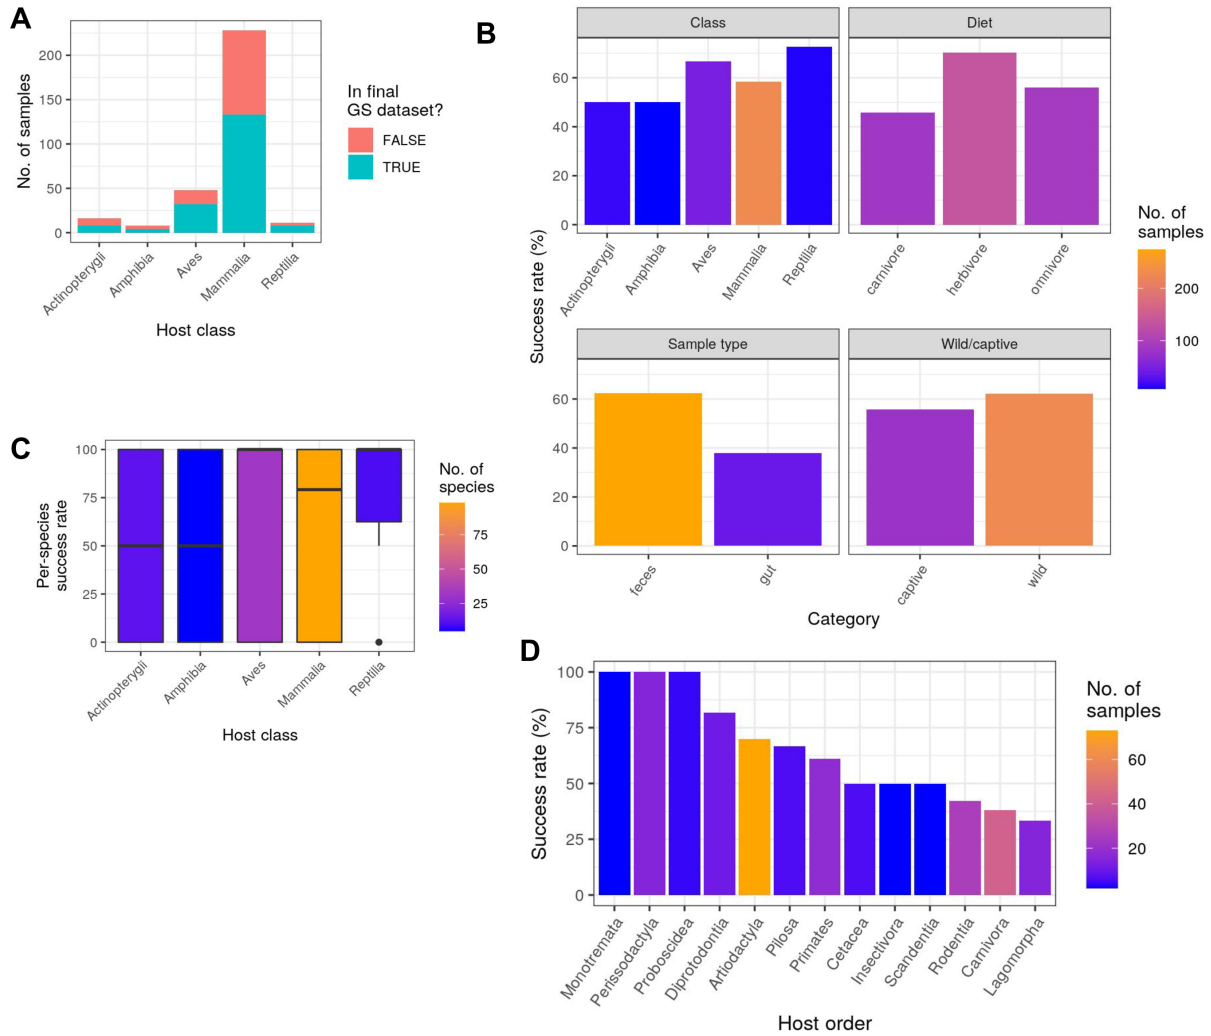

432 **Figure S2.** A) The number of samples that passed or failed PCR amplification and sequence  
 433 data quality control. B) The percent of total samples that passed PCR amplification and  
 434 sequence data quality control (*i.e.*, the success rate), with values grouped by various host  
 435 metadata categories. C) The success rate among individuals of the same species, grouped by  
 436 host class. D) The success rate for each mammalian taxonomic order. See Table S2 for a list of  
 437 all successes and failures.

Tree scale: 100

NGS\_pass\_fail  
■ failed  
■ passed

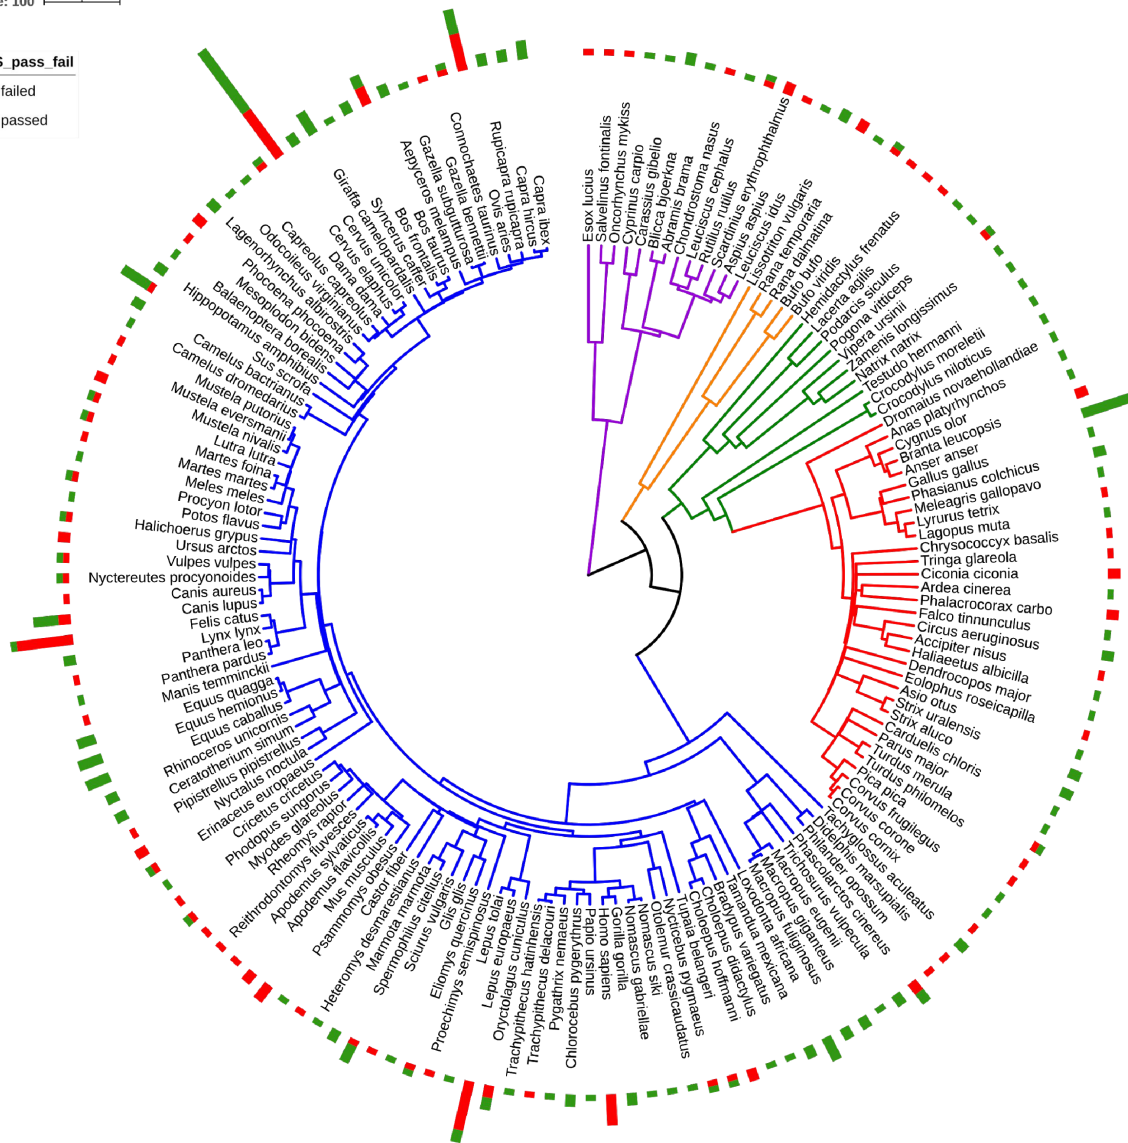

438 **Figure S3.** The number of samples that passed PCR amplification and sequence data quality  
439 control (“passed”) and those that failed (“failed”) mapped onto a phylogeny of all host species.  
440 The phylogeny is the same as shown in Figure 1.

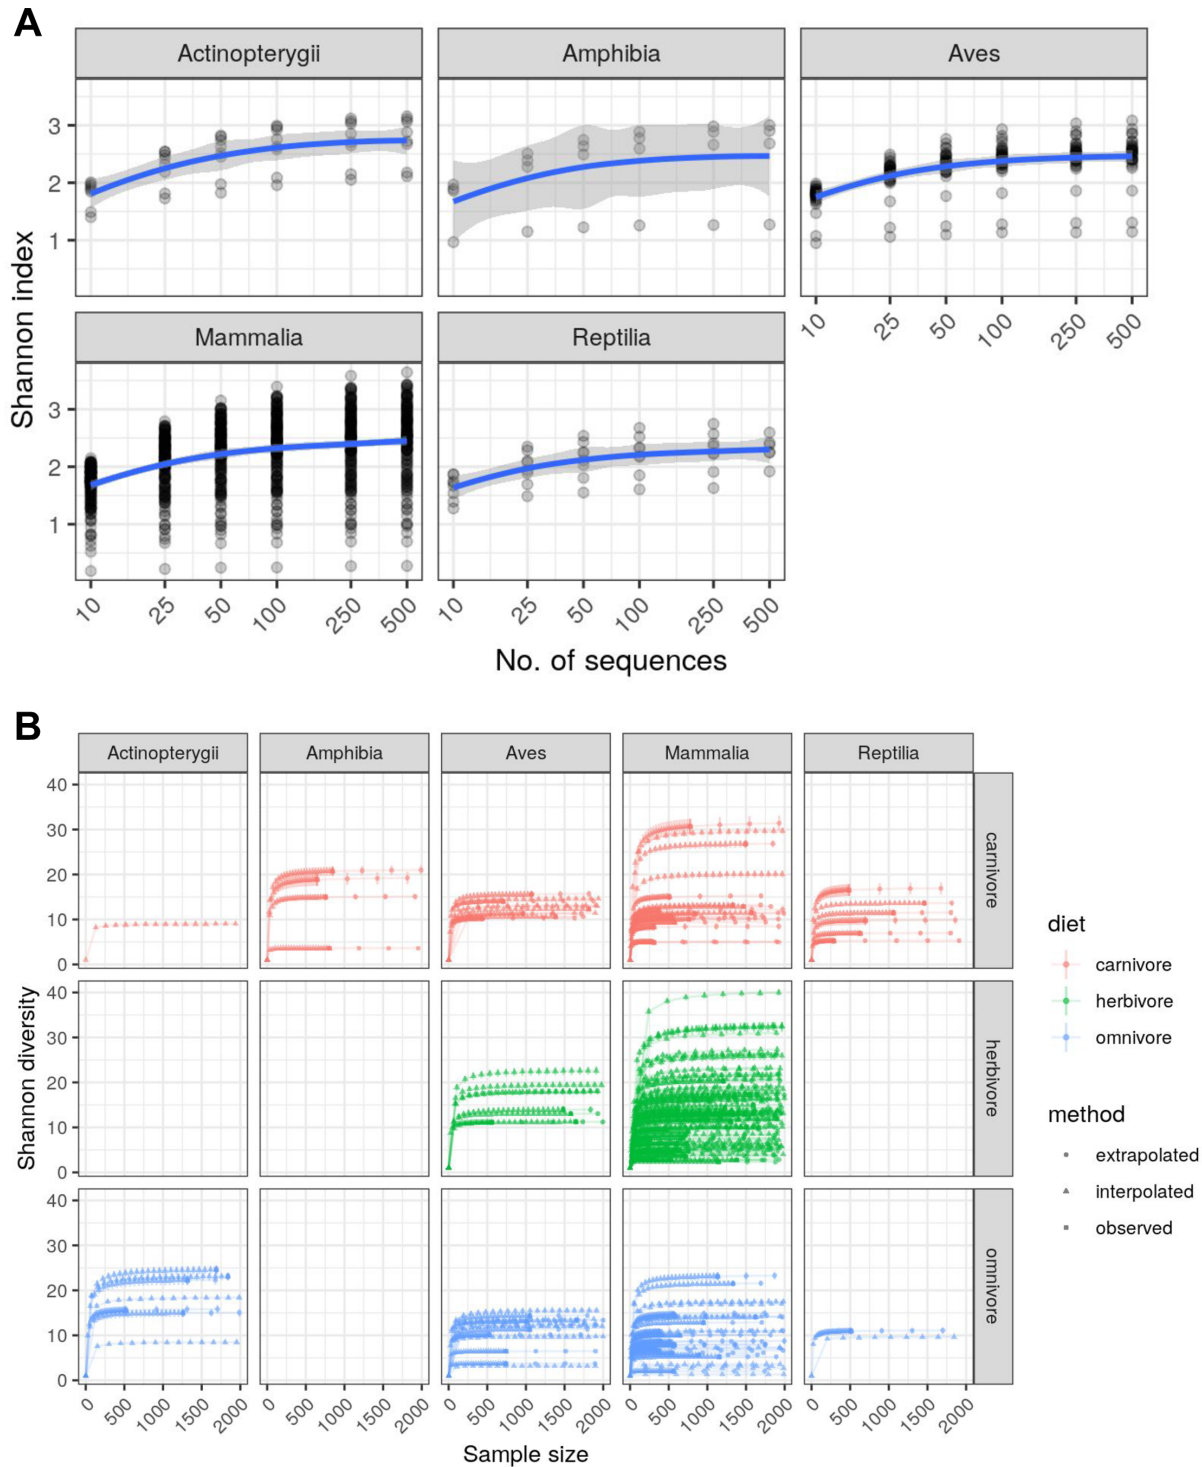

441 **Figure S4.** A) Rarefaction grouped by host taxonomic class, with subsampling continued up to  
 442 500 per sample (if possible, depending on the sample). The blue lines are a smoothed curve fit,  
 443 with grey regions denoting the 95% CI. B) Rarefaction with extrapolation via iNEXT, with  
 444 subsampling/extrapolation up to 2000 per sample. Diversity was measured as Hill numbers  
 445 (diversity order of 1, which is equivalent to Shannon diversity).

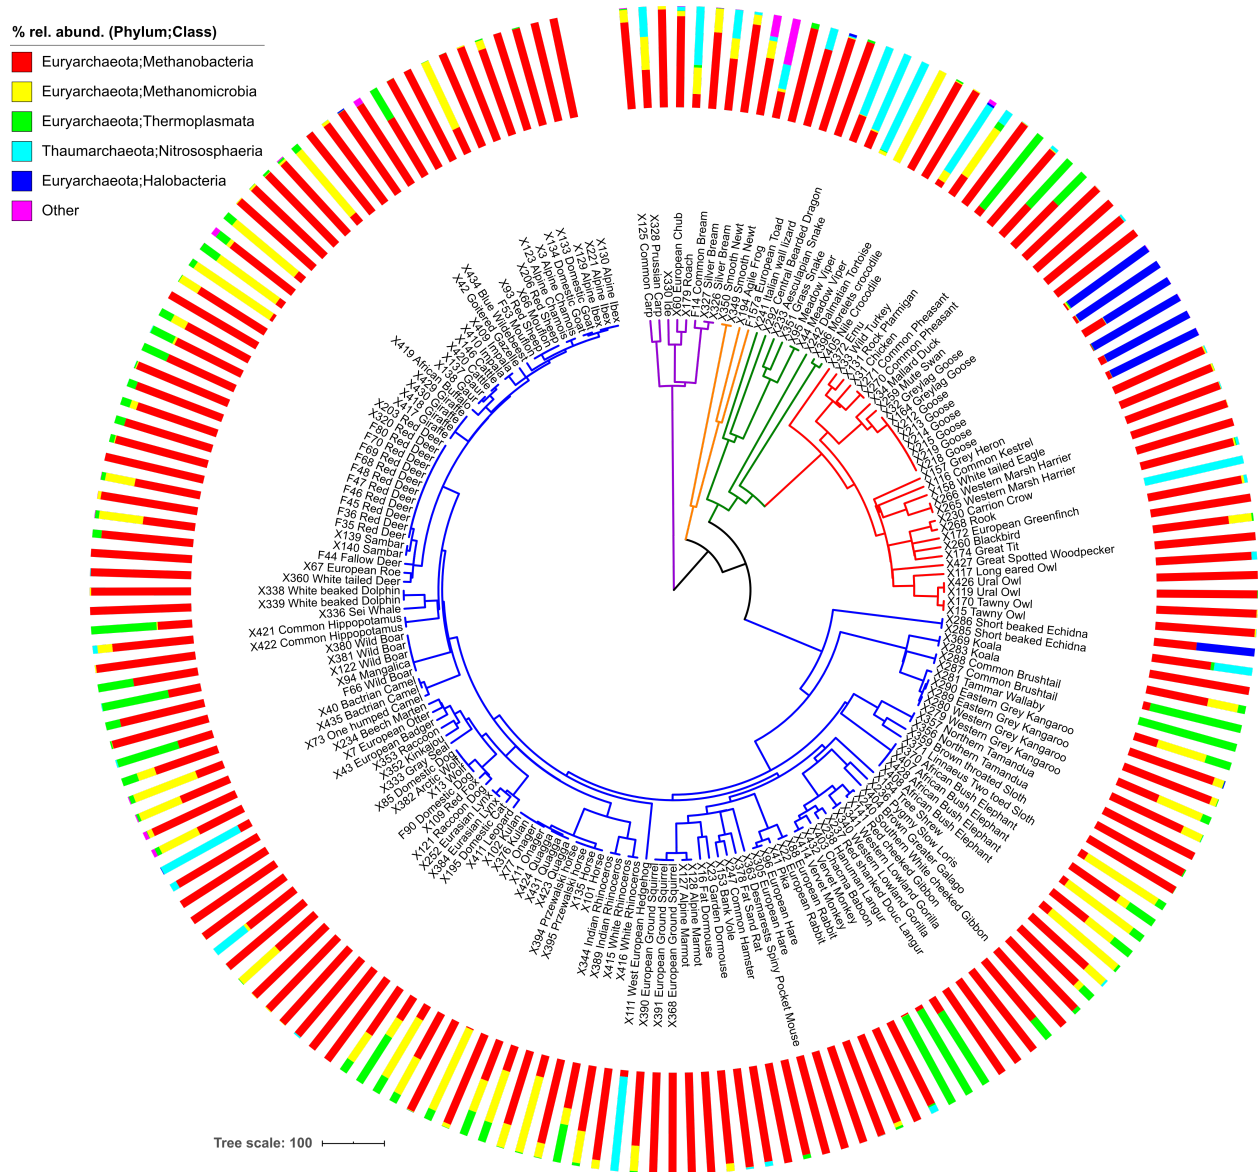

446 **Figure S5.** The host phylogeny is that same as shown in Figure 1, except tips have been  
 447 expanded to include all individuals of each species ( $n = 185$ ). Relative abundances of ASVs  
 448 aggregated by taxonomic class are mapped onto the tree. All classes with <1% mean  
 449 abundance are labeled as “Other”, which includes Woesearchaeia, Thermococci, Iainarchaeia,  
 450 and Odinarchaeia.

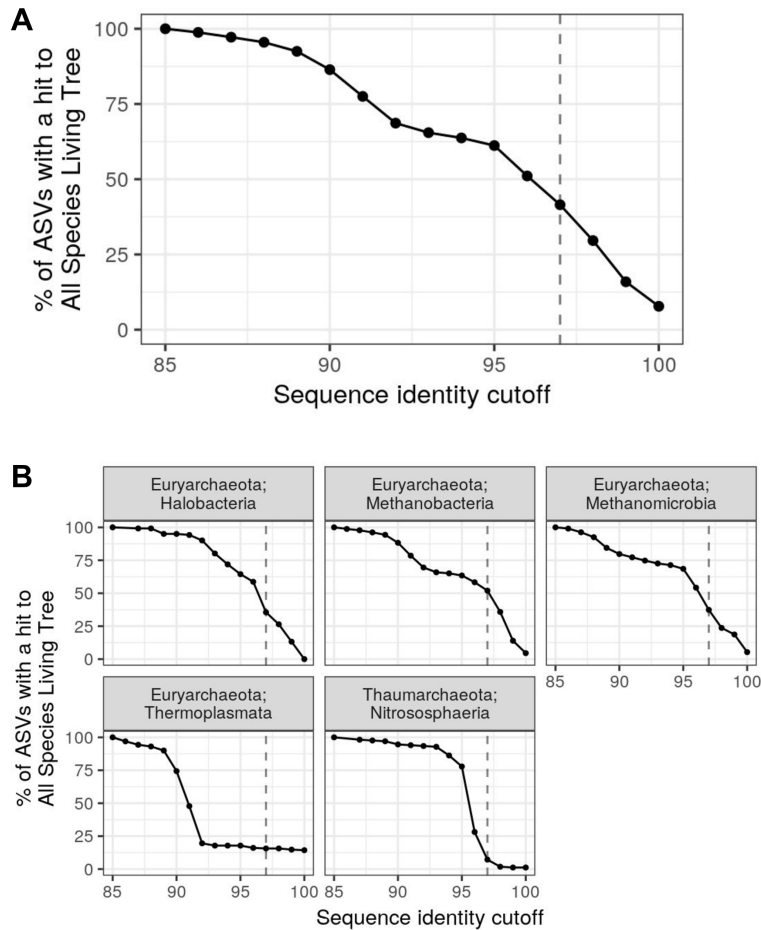

451 **Figure S6.** *Substantial uncultured archaeal diversity even among relatively well-studied clades.*  
 452 The percent of ASVs with a  $\geq 1$  BLASTn hit to a culture representative in the All Species Living  
 453 Tree database v132 (hit alignment length  $\geq 95\%$  of the query), depending on the sequence  
 454 identity cutoff of the BLASTn hit. Values are shown for A) all ASVs and B) ASVs grouped by  
 455 taxonomic class (facet labels are “Phylum; Class”) for the subset of classes in which any hits  
 456 were observed along the range of sequence identity cutoffs shown.



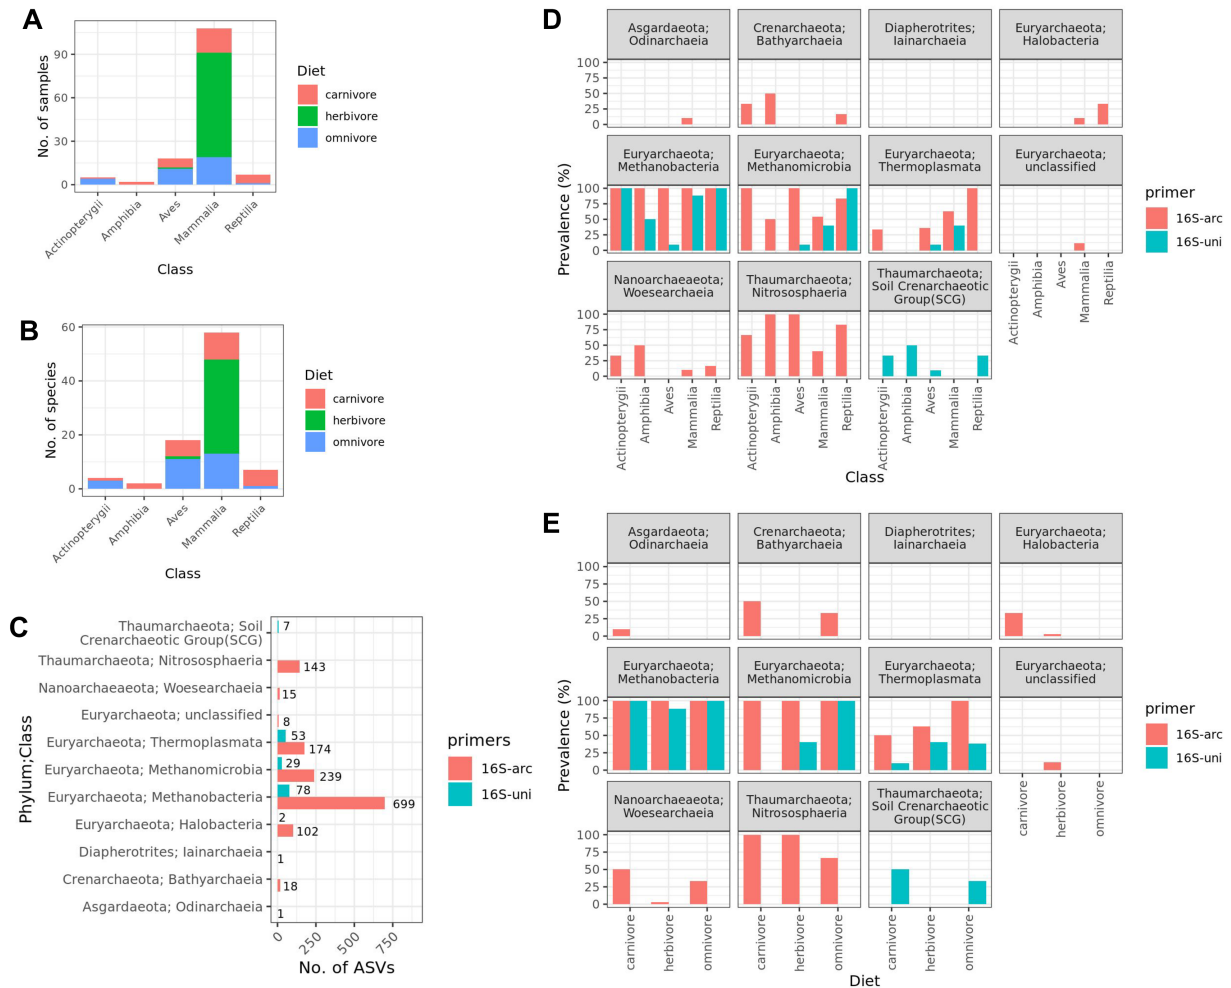

457 **Figure S7.** Archaeal-targeting primer set revealed much more archaeal diversity than standard  
 458 “universal” 16S rRNA NGS primers. The number of A) samples or B) host species that overlap  
 459 between the 16S-arc and 16S-uni amplicon sequence datasets. C) The number of archaeal  
 460 ASVs per sequence dataset. D) & E) The number of archaeal classes across host species  
 461 grouped by D) host taxonomic class or E) diet.

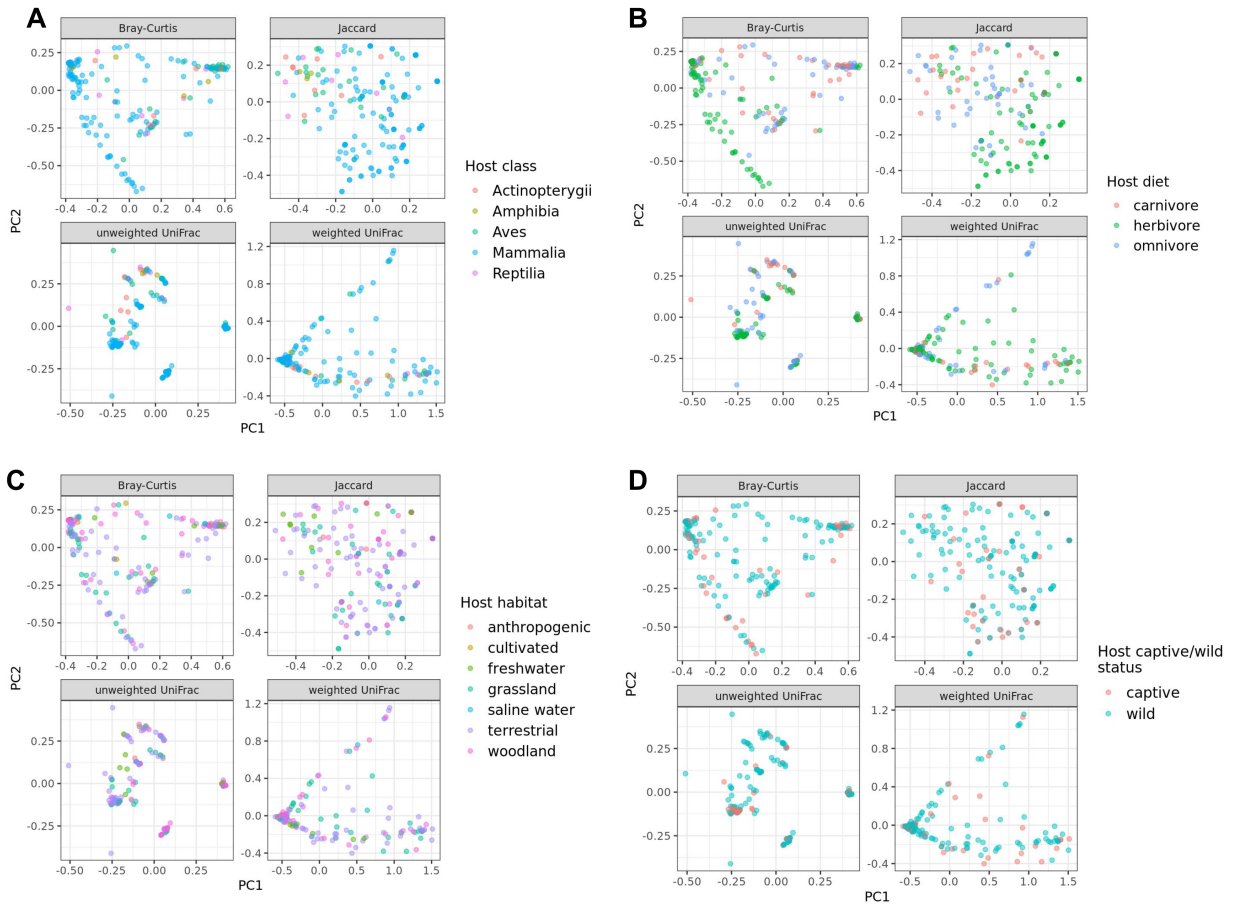

462 **Figure S8.** *Principal coordinates plots qualitatively agree with the MRM analysis results.*  
 463 Principal coordinates (PCoA) ordinations of unweighted and weighted UniFrac, Jaccard, and  
 464 Bray-Curtis distances among all samples, with samples colored by host A) class, B) diet, C)  
 465 habitat, and D) captive/wild status. The percent variance explained by PC1 and PC2 is 18 & 9 %  
 466 for Bray-Curtis, 14 and 6 % for Jaccard, 29 and 19 % for unweighted UniFrac, and 72 and 12 %  
 467 for weighted UniFrac, respectively.

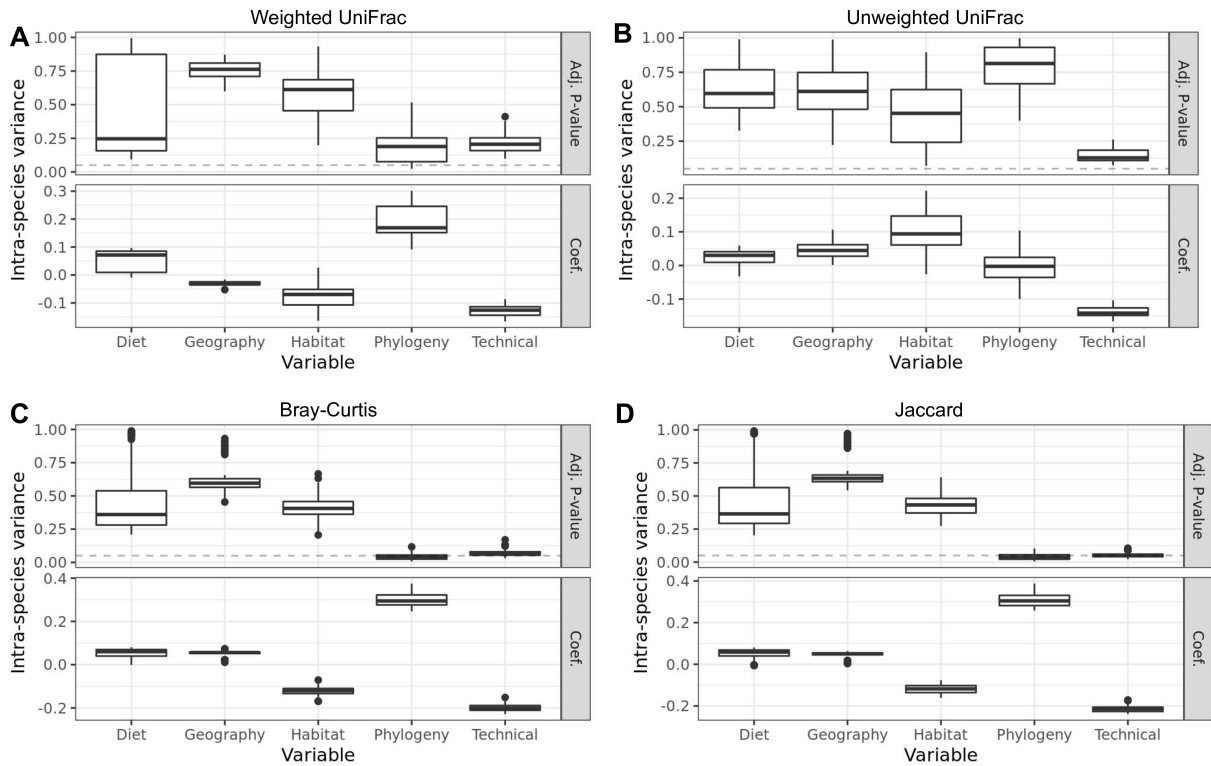

468

469 **Figure S9. Host phylogeny trending to significance for non-mammalian species.** The plots show  
 470 the distribution of P-values (“Adj. P-value”) and partial regression coefficients (“Coef.”) across  
 471 100 dataset permutations used for multiple regression on matrix (MRM) tests. Unlike Figure 2A,  
 472 all Mammalia species were excluded, leaving 39 non-mammalian species. For each  
 473 permutation, one individual per host species was randomly sampled. MRM tests assessed the  
 474 beta diversity variance explained by host diet, geography, habitat, phylogeny, and “technical”  
 475 parameters (see Supplemental Methods), with 4 beta diversity measures assessed: A) weighted  
 476 UniFrac, B) unweighted UniFrac, C) Bray-Curtis, and D) Jaccard. Asterisks denote significance  
 477 (adj.  $P < 0.05$  for  $>95\%$  of dataset subsets; see Methods). Beta diversity calculated on ASVs  
 478 aggregated at the genus level. Box centerlines, edges, whiskers, and points signify the median,  
 479 interquartile range (IQR),  $1.5 \times \text{IQR}$ , and  $>1.5 \times \text{IQR}$ , respectively.

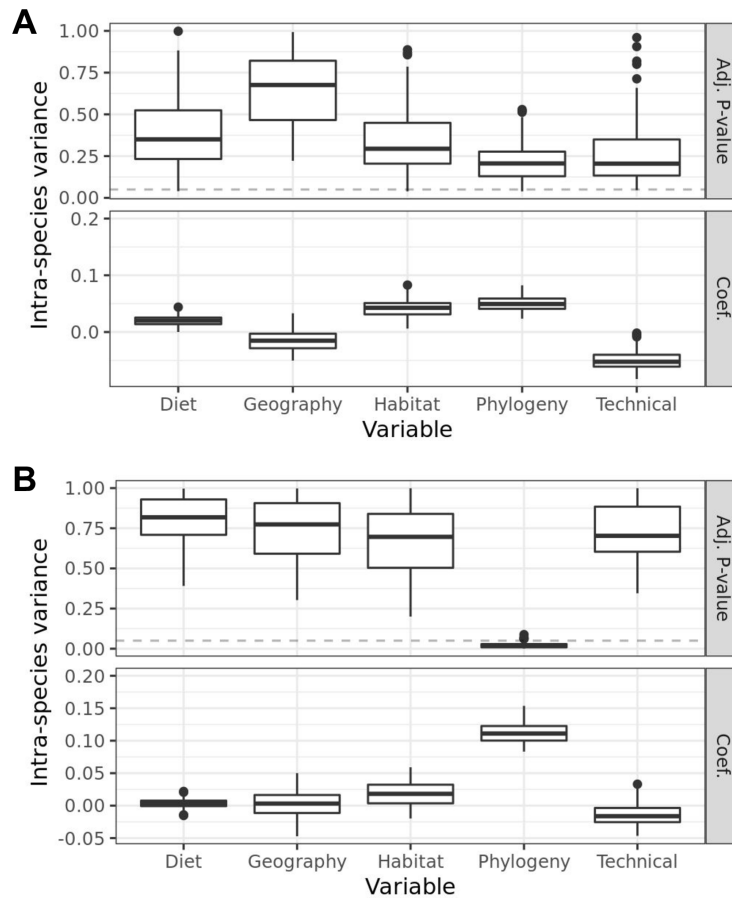

480 **Figure S10** . *No host factors significantly explain archaeal alpha diversity.* The plots show the  
 481 distribution of P-values (“Adj. P-value”) and partial regression coefficients (“Coef.”) across 100  
 482 dataset permutations used for multiple regression on matrix (MRM) tests. For each permutation,  
 483 one individual per host species was randomly sampled. MRM tested whether inter-sample  
 484 variance of alpha diversity was significantly explained by host diet, geography, habitat, phylogeny,  
 485 and “technical” parameters (see Methods), with 2 alpha diversity measures assessed: A)  
 486 Shannon Index and B) Faith’s PD. No variables were significant (defined as adj.  $P < 0.05$  for  
 487  $>95\%$  of dataset permutations; see Supplemental Methods). Box centerlines, edges, whiskers,  
 488 and points signify the median, interquartile range (IQR),  $1.5 \times$  IQR, and  $>1.5 \times$  IQR,  
 489 respectively.

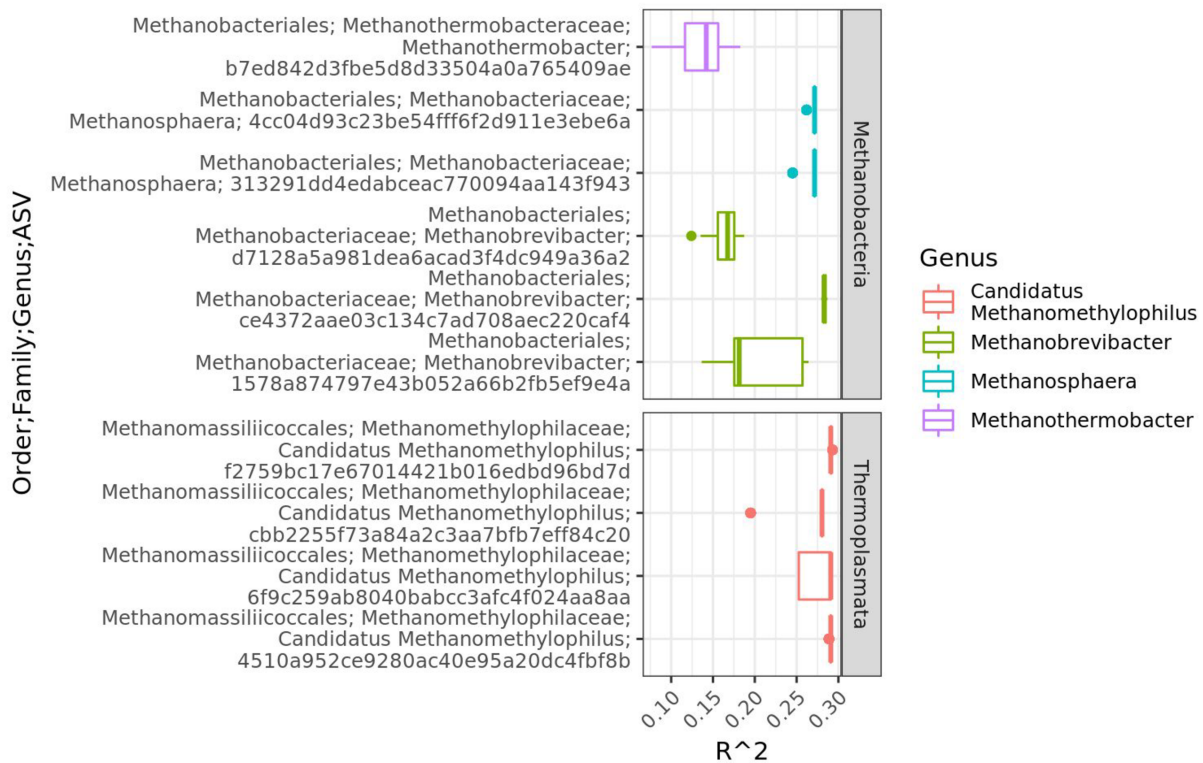

490 **Figure S11.** *Certain methanogen ASVs from multiple lineages are associated with diet, after*  
 491 *accounting for host phylogeny.* Phylogenetic generalized least squares (PGLS) results for the  
 492 ASVs with a significant association between ASV abundance and host diet, while accounting for  
 493 host phylogenetic relatedness. Significance was defined as adj.  $P < 0.05$  in  $\geq 95\%$  of permuted  
 494 datasets, in which one sample per species was used per permutation. The boxplots depict the  
 495 distribution of PGLS  $R^2$  values across all 100 permutations. Box centerlines, edges, whiskers,  
 496 and points signify the median, interquartile range (IQR),  $1.5 \times \text{IQR}$ , and  $>1.5 \times \text{IQR}$ ,  
 497 respectively.



**A**

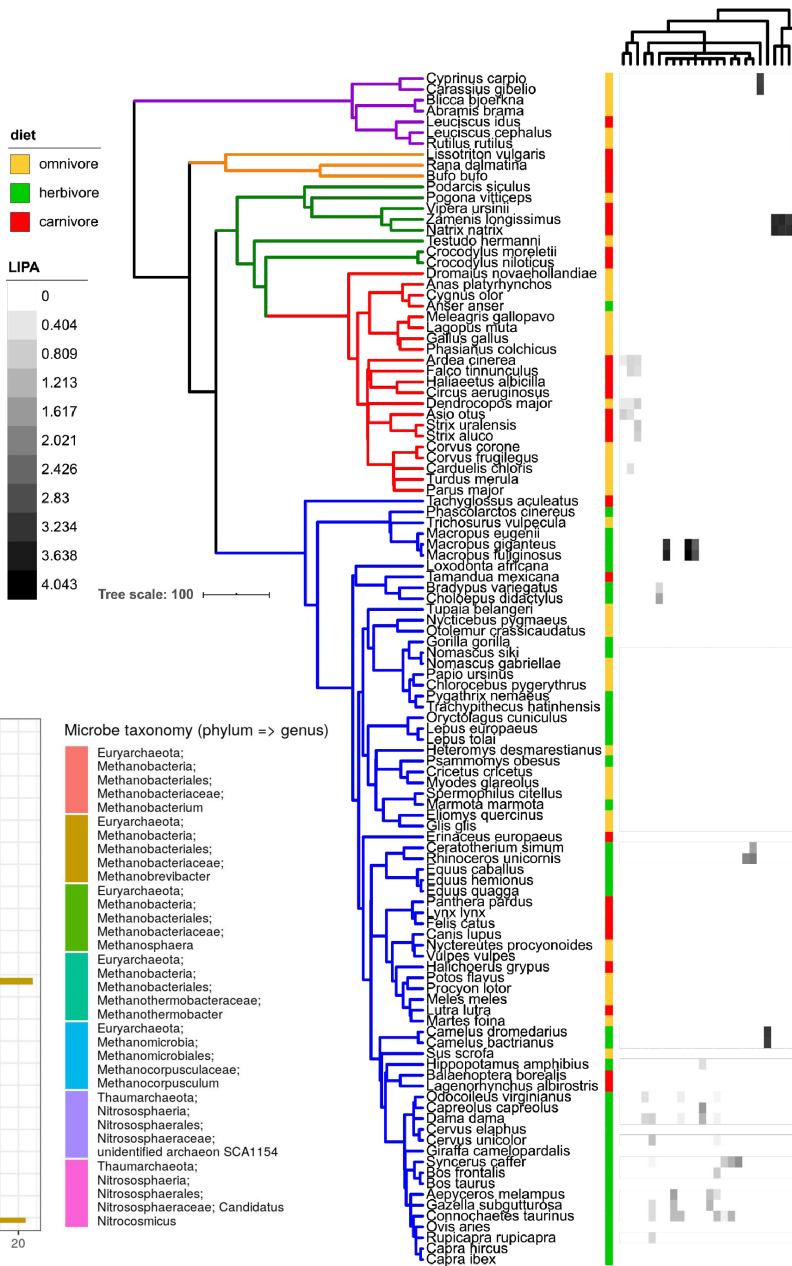

**B**

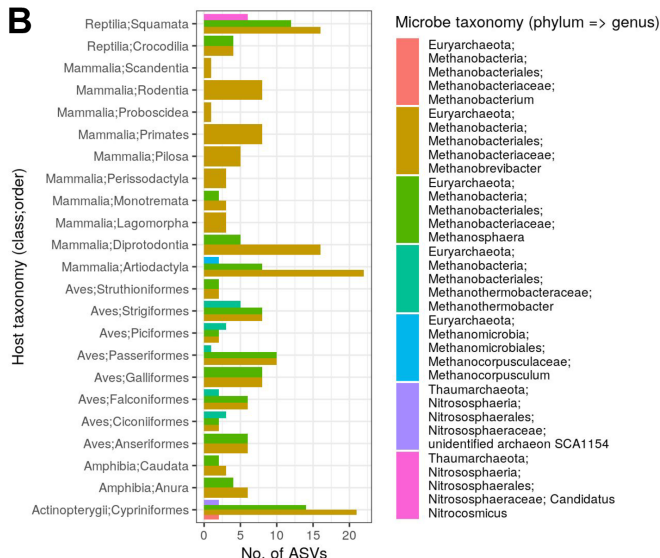

498 **Figure S12.** *The specific ASVs have similar abundances within certain vertebrate clades.*  
 499 Various archaeal ASVs display local phylogenetic signal to various host clades. A) All ASVs with  
 500 significant local phylogenetic signals (adj.  $P < 0.05$ ) are mapped onto the host phylogeny. The  
 501 phylogeny is the same as shown in Figure 1. The heatmap depicts local indicator of  
 502 phylogenetic association (LIPA) values for each ASV–host association, with higher values  
 503 indicating a stronger phylogenetic signal of ASV abundance. White boxes in the heatmap  
 504 indicate non-significant LIPA tests. The dendrogram on the top of the heatmap is a cladogram  
 505 based on taxonomy for each ASV (see Figure S13 for the full taxonomy). B) The bar plots show  
 506 the number of ASVs with significant LIPA indices per archaeal genus and host clade.

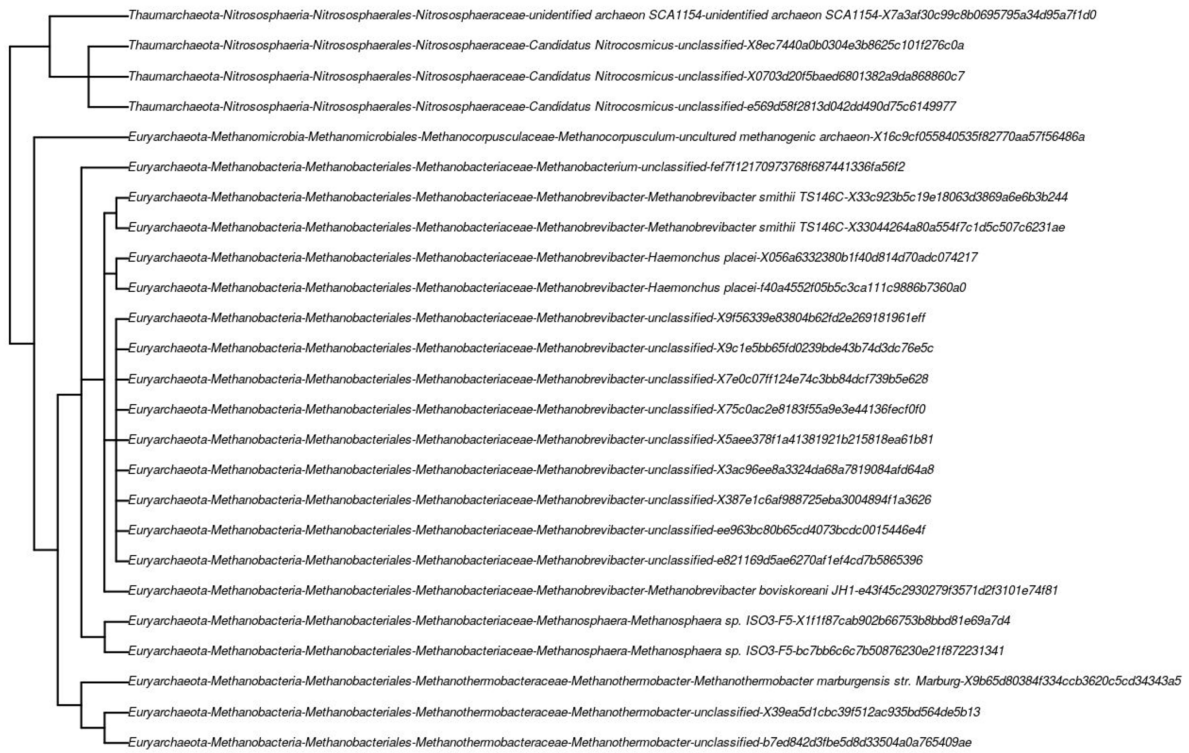

507 **Figure S13.** The cladogram as shown in Figure S12 with the entire ASV taxonomic  
 508 classification as tip labels.

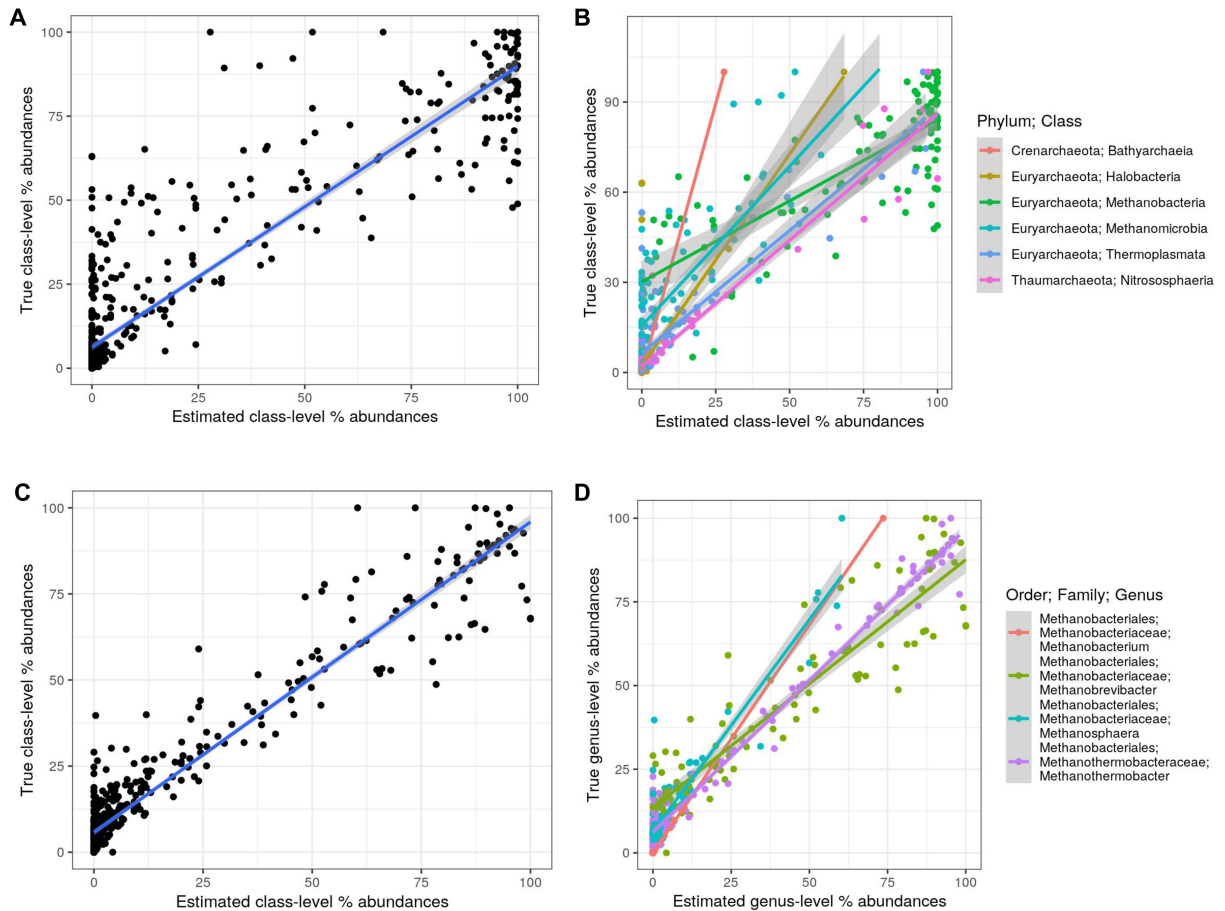

509 **Figure S14.** *Ancestral state reconstruction models accurately predict abundances in extant host*  
 510 *species.* Linear regressions comparing ASR model predictions of archaeal abundances for each  
 511 extant species relative to the observed mean abundance of all individuals per species. A) All  
 512 class-level abundances, and B) abundances and linear regressions colored by class. C) All  
 513 genus-level abundances for taxa belonging to Methanobacteria, and D) abundances and linear  
 514 regressions colored by genus. Gray areas denote 95% confidence intervals for each linear  
 515 model.

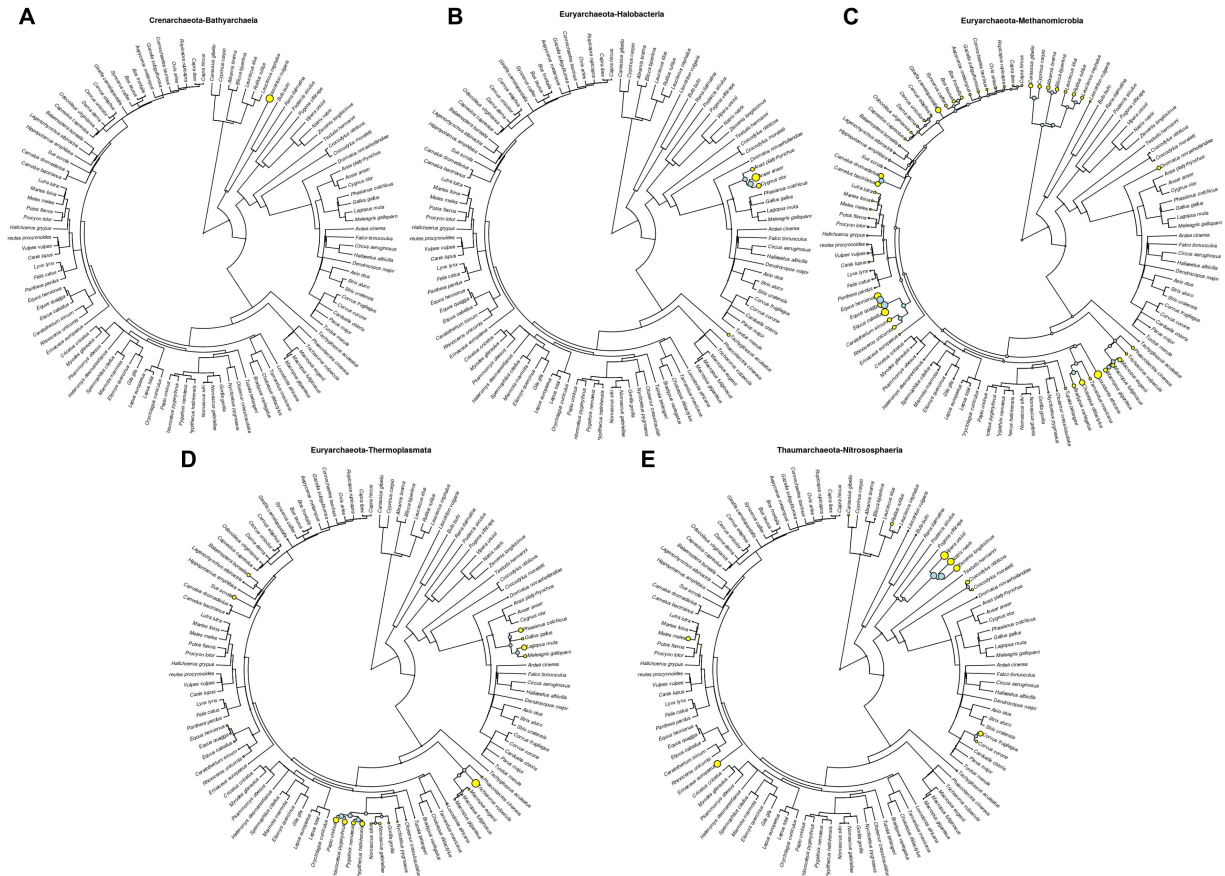

516 **Figure S15.** Predicted archaeal class-level abundance for extant host species (yellow circles)  
 517 and and ancestral host species (blue circles): A) Bathyarchaeia, B) Halobacteria, C)  
 518 Methanomicrobia, D) Thermoplasmata, and E) Nitrososphaeria. The phylogeny is the same as  
 519 shown in Figure 1.

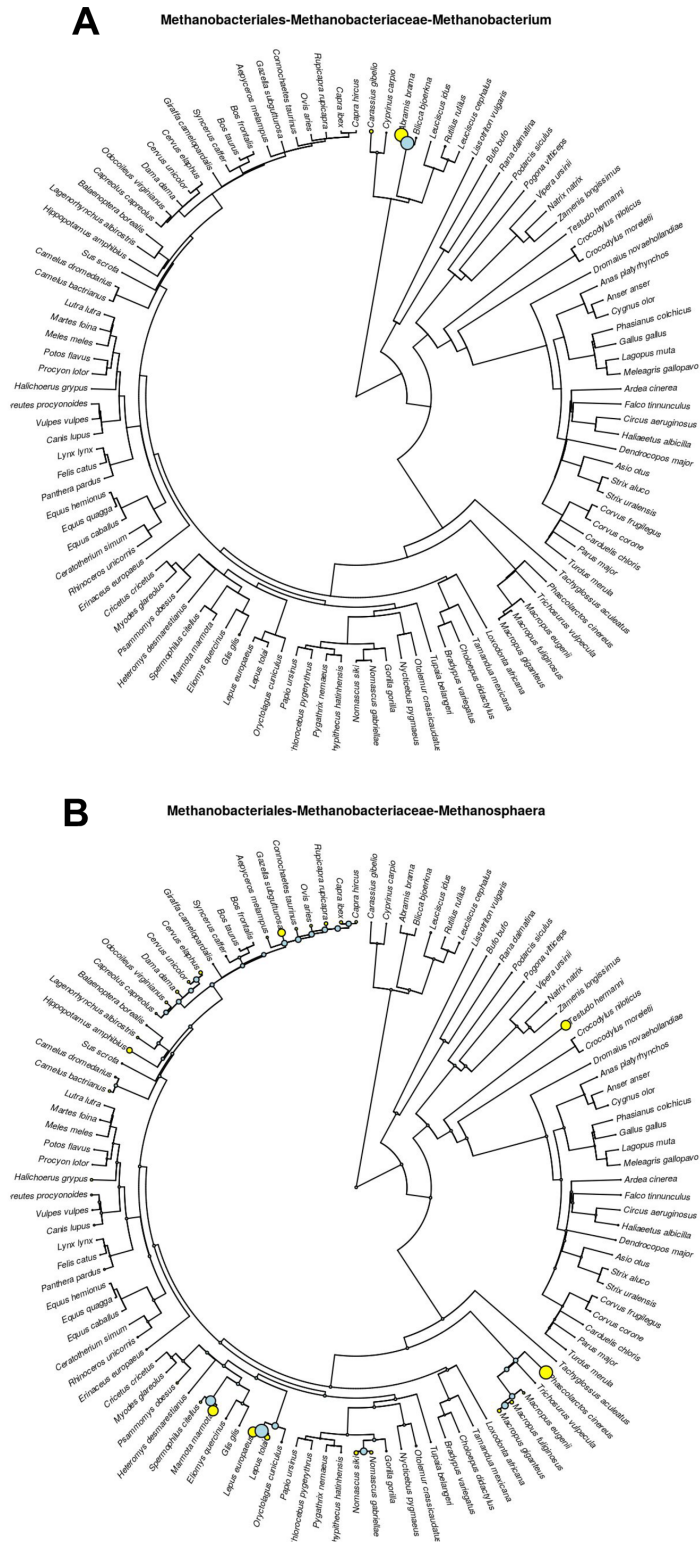

520 **Figure S16.** Predicted archaeal genus-level abundance for extant host species (yellow circles)  
 521 and and ancestral host species (blue circles): A) Methanobacterium and B) Methanosphaera.  
 522 The phylogeny is the same as shown in Figure 1.

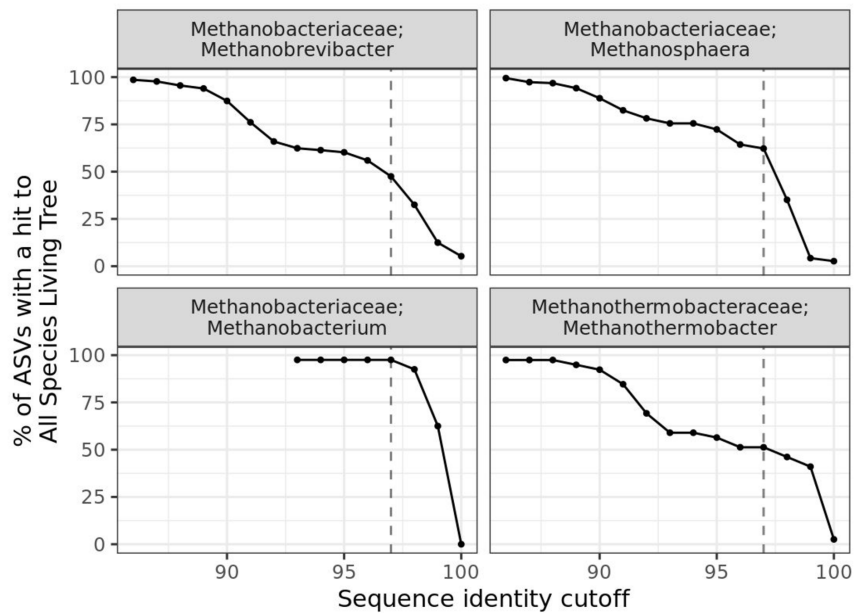

523 **Figure S17.** *Methanobacteria* genera comprise a high proportion of uncultured ASVs. Same as  
 524 Figure S6, but just *Methanobacteria* genera. The plot facet labels are “family; genus”.



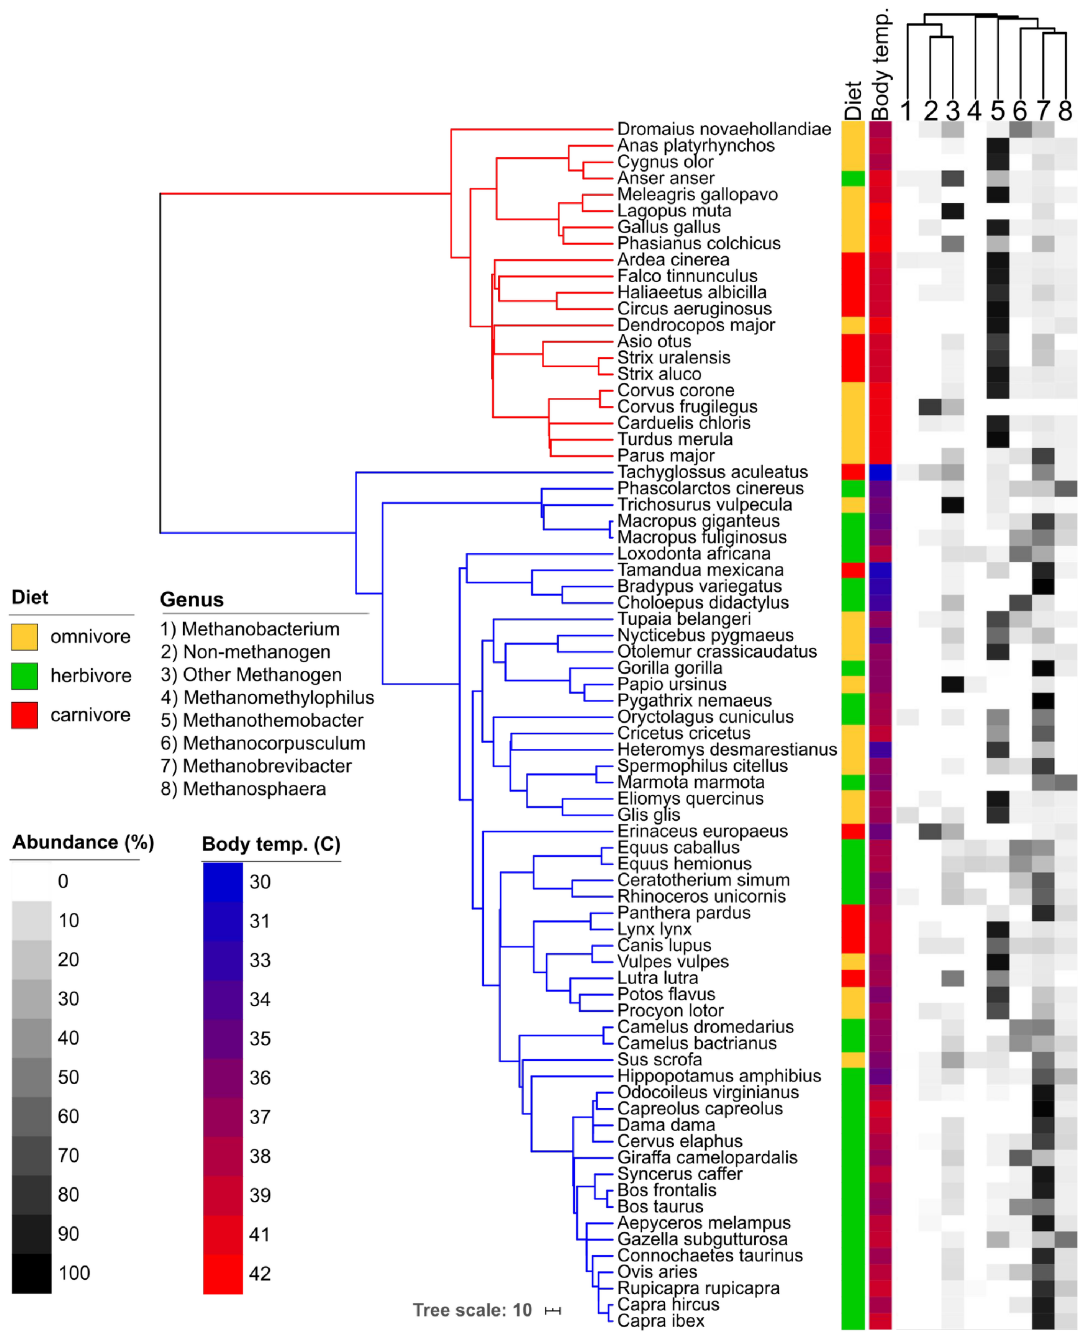

525 **Figure S18.** *Methanothermobacter* is prevalent among avian species and associates with host  
 526 *body temperature*. The phylogeny is a pruned version ( $n = 74$ ) of that shown in Figure 1. Host  
 527 diet and body temperature are mapped into the tree along with genus-level archaeal  
 528 abundances. The dendrogram above the heatmap is a cladogram depicting taxonomic  
 529 relatedness. “Other Methanogen” refers to all other methanogen genera not specifically listed,  
 530 and “Non-methanogen” refers to all non-methanogenic clades.

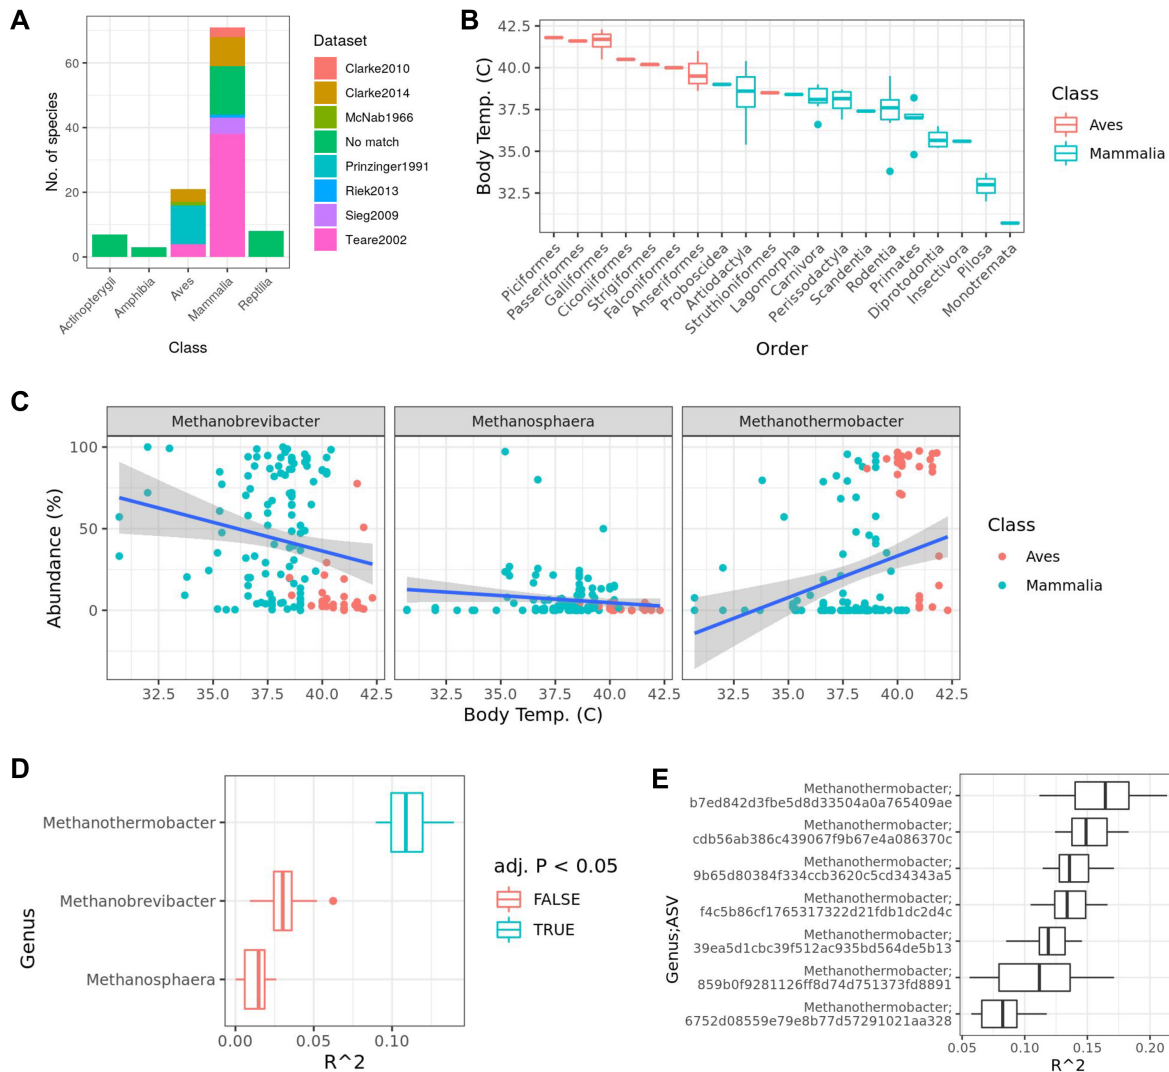

531 **Figure S19. *Methanothermobacter* abundance is explained by host body temperature.** A) The  
532 number of species with body temperature data, grouped by the body temperature dataset (see  
533 also Table S6). B) The distribution of body temperatures per host taxonomic order (one data  
534 point per species). C) Relative abundances of Methanobacteria genera as a function of host  
535 body temperature (celcius). The lines denote linear regressions with 95% CIs represented by  
536 the grey zones. D) RRPP coefficients of genus-level abundances as a linear function of host  
537 body temperature. Boxplots show the distribution across 100 permutations. E) The same as D,  
538 but ASV-level abundances used, with only significant ASVs shown. Note that host phylogeny  
539 was not used for the RRPP models shown in D & E. No taxa were significant when accounting  
540 for host phylogeny. Box centerlines, edges, whiskers, and points signify the median, interquartile  
541 range (IQR),  $1.5 \times$  IQR, and  $>1.5 \times$  IQR, respectively.

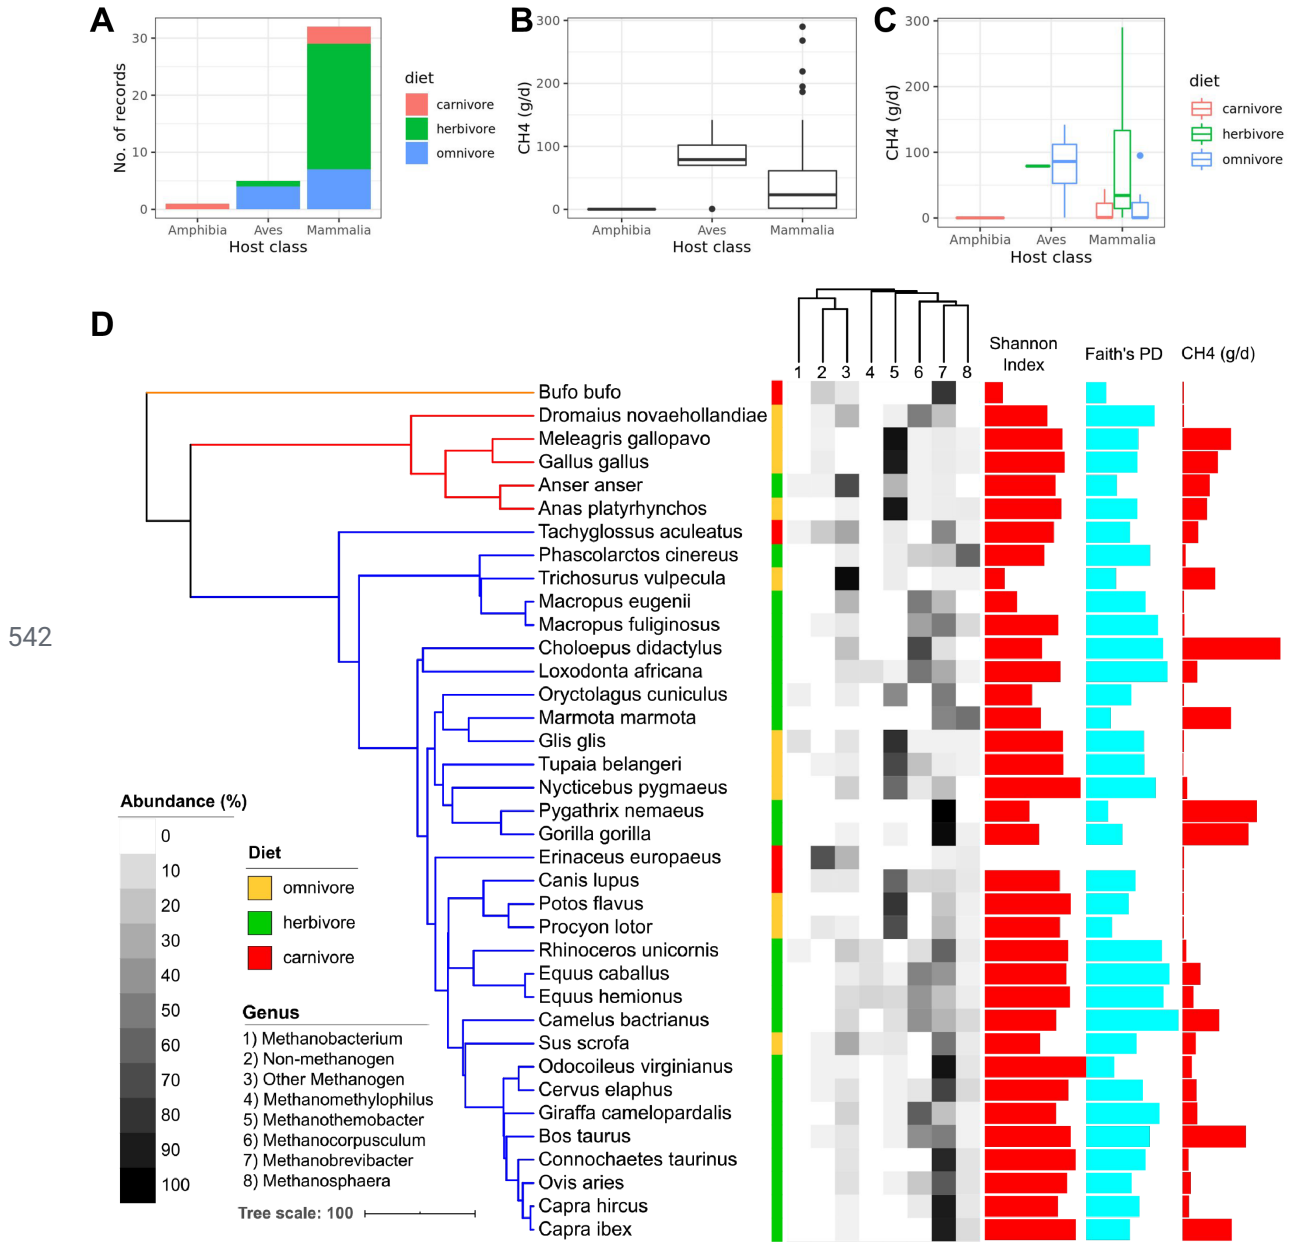

543 **Figure S20.** Published animal methane emission data indicates that the avian species  
 544 dominated by *Methanothermobacter* emit substantial amounts of methane. A) The number of  
 545 records obtained from Hackstein & van Alen 1996 ( $n = 27$ ) and Clauss et al., 2020 ( $n = 10$ ),  
 546 grouped by host class and diet. B) & C) the distribution of methane emission rates per host  
 547 species, grouped by class and C) colored by host diet. D) The phylogeny is a pruned version of  
 548 that shown in Figure 1. From left to right, the data mapped onto the phylogeny is: host diet,  
 549 methanogen genus mean abundances, methanogen ASV diversity (Shannon Index & Faith's  
 550 PD), and methane emission rates. The lack of diversity values for *Erinaceus europaeus*  
 551 (European hedgehog) is due to an absence of detectable methanogen ASVs. Box centerlines,  
 552 edges, whiskers, and points signify the median, interquartile range (IQR),  $1.5 \times$  IQR, and  $>1.5 \times$   
 553 IQR, respectively.

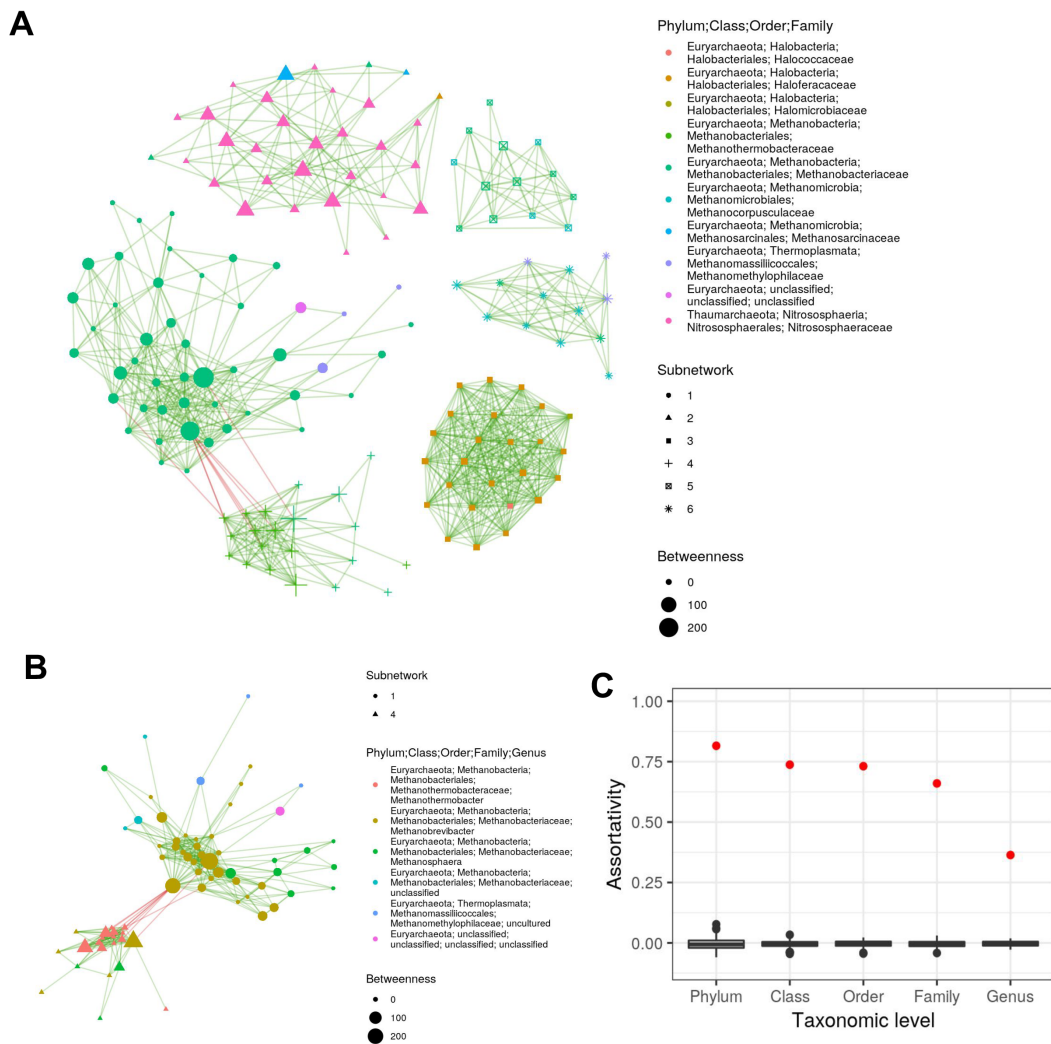

554 **Figure S21.** *Archaeal ASVs generally co-occur with members of the same taxonomic group.*  
 555 The network nodes represent ASVs, with color denoting family-level taxonomic classifications,  
 556 and shape denoting subnetwork (defined by clustering the network with the walktrap algorithm).  
 557 Edges represent significant positive and negative co-occurrences among ASVs as denoted by  
 558 green and red edges, respectively. Node size represents “betweenness”, which is a measure of  
 559 node connectedness. For clarity, only the largest 6 subnetworks are shown (but see Figure  
 560 S22). B) Only subnetworks 1 and 4 are shown with node colors denoting genus-level  
 561 classifications. C) The assortativity of ASVs by taxonomic level, in which a value of 1 means  
 562 that all connected ASVs belong to the same taxonomic group, while a value of 0 denotes  
 563 random association, and negative values indicate a dominance of inter-clade associations. The  
 564 red points are the observed values, while the boxplots denote values for 100 permutations of  
 565 networks with the same number of nodes and edges as the true network, but edges were  
 566 randomly assigned. Box centerlines, edges, whiskers, and points signify the median,  
 567 interquartile range (IQR),  $1.5 \times \text{IQR}$ , and  $>1.5 \times \text{IQR}$ , respectively.

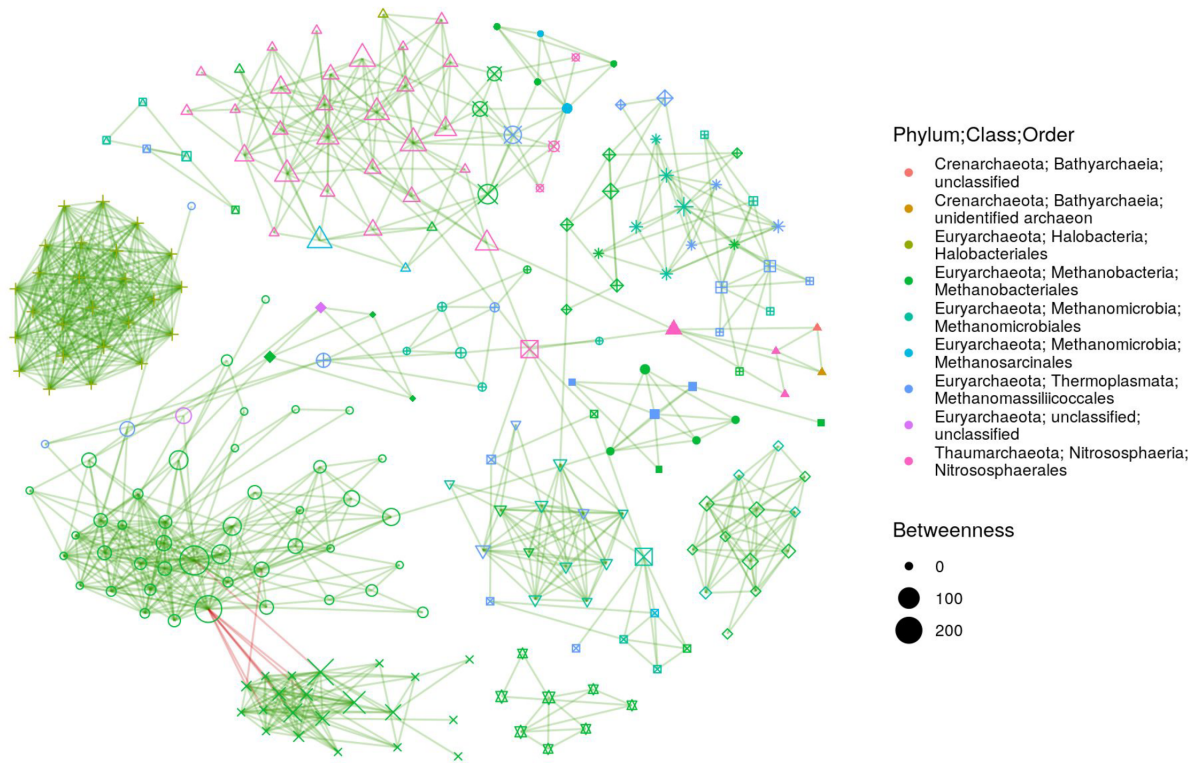

568 **Figure S22.** The same co-occurrence network as shown in Figure S21, but the largest 19  
 569 subnetworks are shown (238 of 313 ASVs) instead of just the largest 6 (151 of 313 ASVs). The  
 570 entire co-occurrence network comprised 96 subnetworks, but to be able to distinguish among  
 571 shapes denoting network nodes, only the top 19 subnetworks are shown.



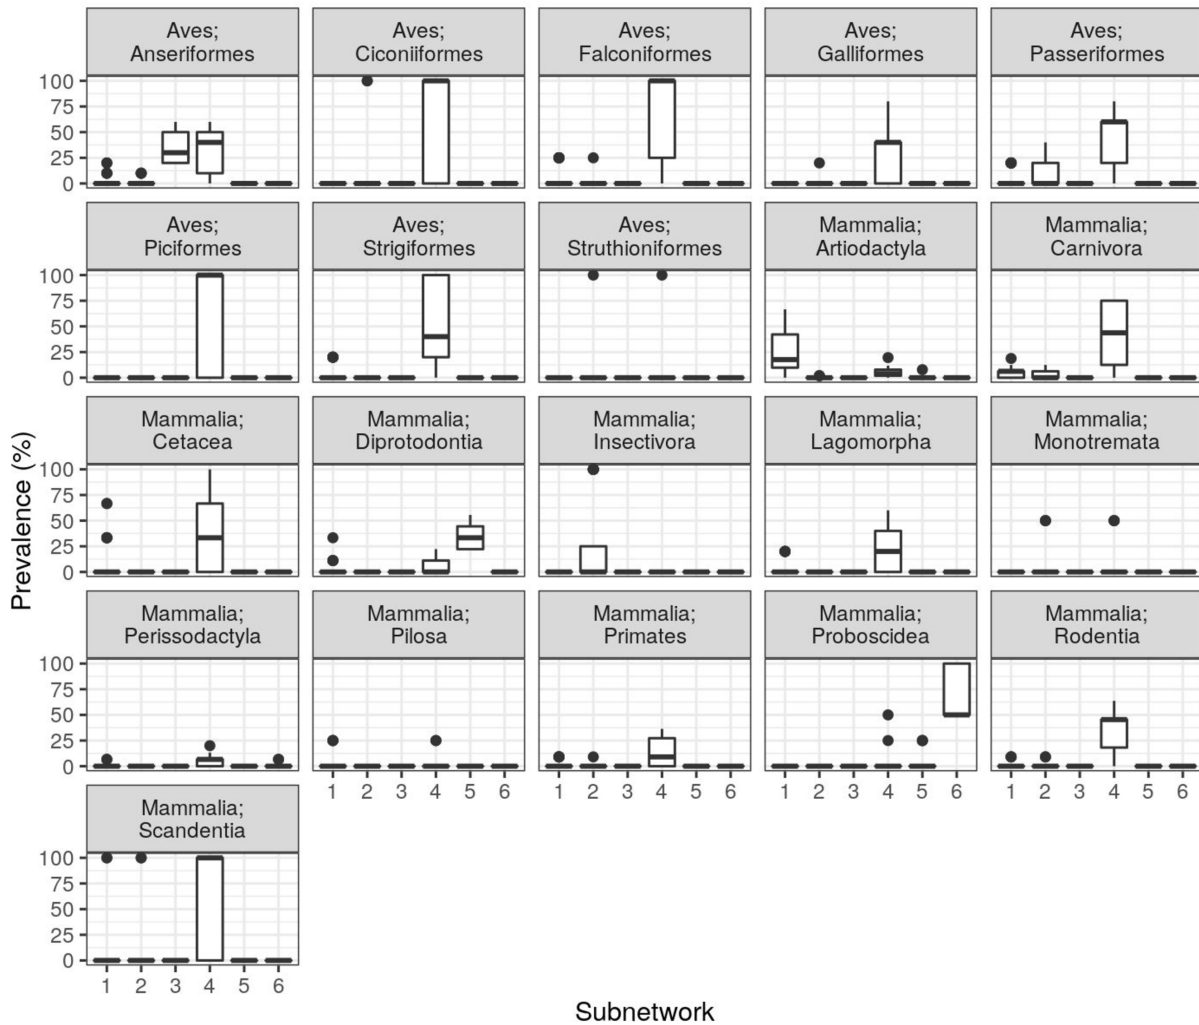

572 **Figure S23.** The percent of samples in which each ASV was observed (prevalence), grouped  
 573 by the subnetwork to which each ASV belongs (see Figure S21A) and faceted by host  
 574 taxonomic order. Box centerlines, edges, whiskers, and points signify the median, interquartile  
 575 range (IQR),  $1.5 \times$  IQR, and  $>1.5 \times$  IQR, respectively.

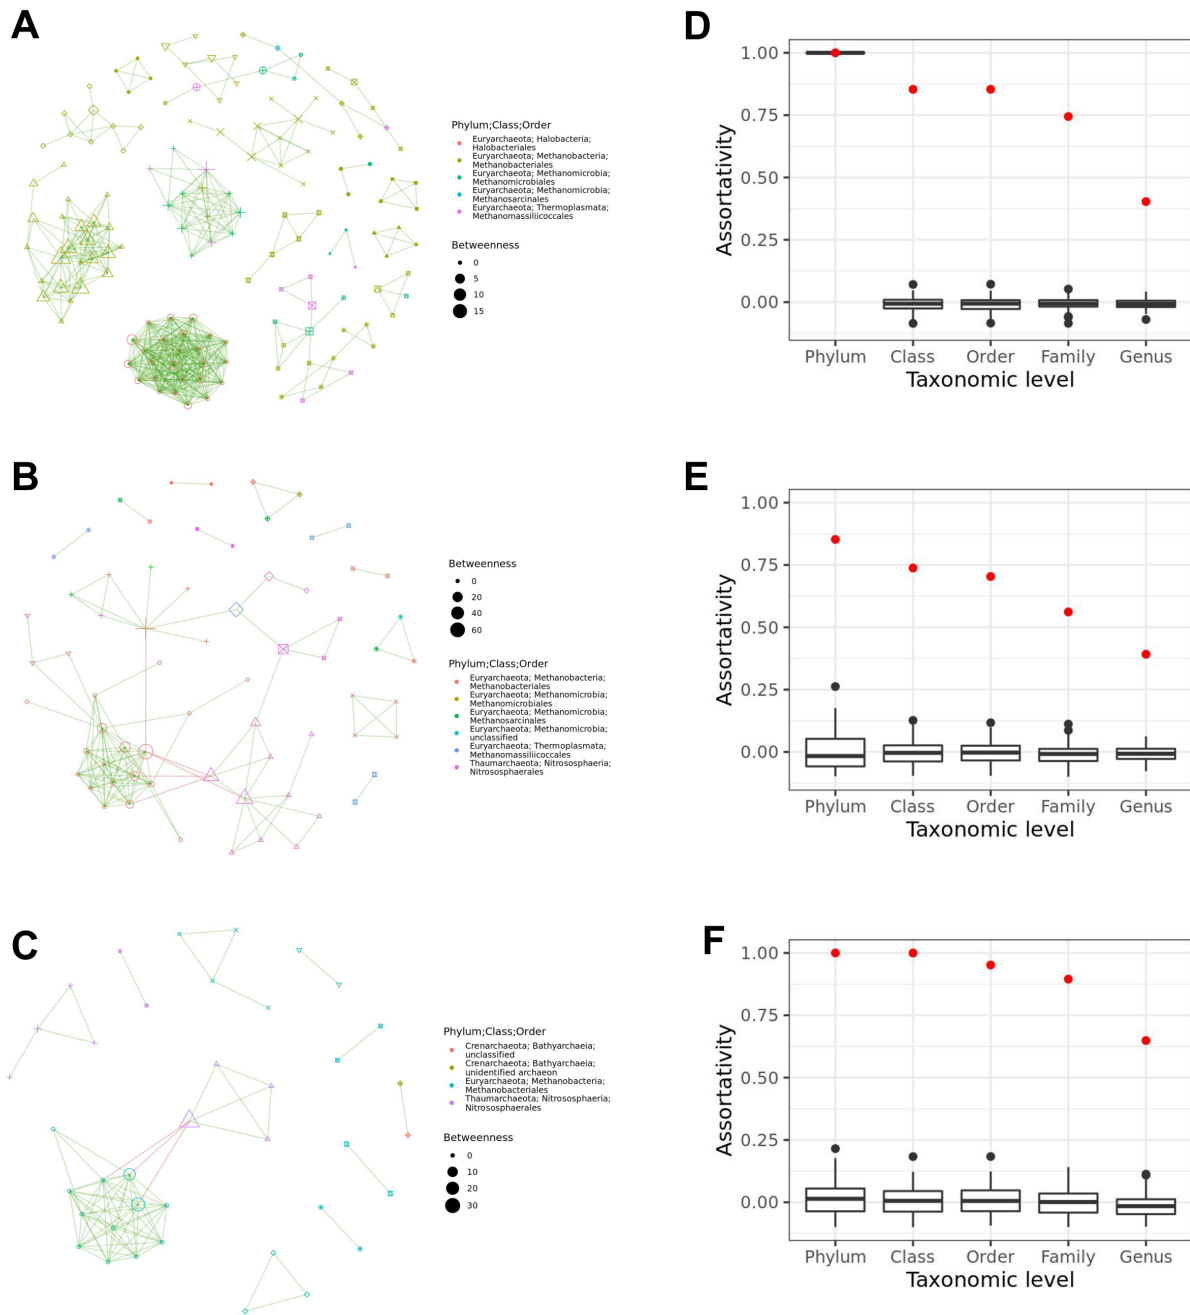

576 **Figure S24.** Co-occurrence networks for A) just herbivore, B) just omnivore, C) just carnivore  
 577 samples. Node size represents “betweenness”, which is a measure of node connectedness.  
 578 Green and red edges denote significant positive and negative co-occurrences, respectively.  
 579 D-F) Assortativity of nodes the graph, determined for each taxonomic level from phylum to  
 580 genus. High assortativity values indicate that the co-occurring taxa largely belong to the same  
 581 taxonomic group. Box centerlines, edges, whiskers, and points signify the median, interquartile  
 582 range (IQR),  $1.5 \times \text{IQR}$ , and  $>1.5 \times \text{IQR}$ , respectively.

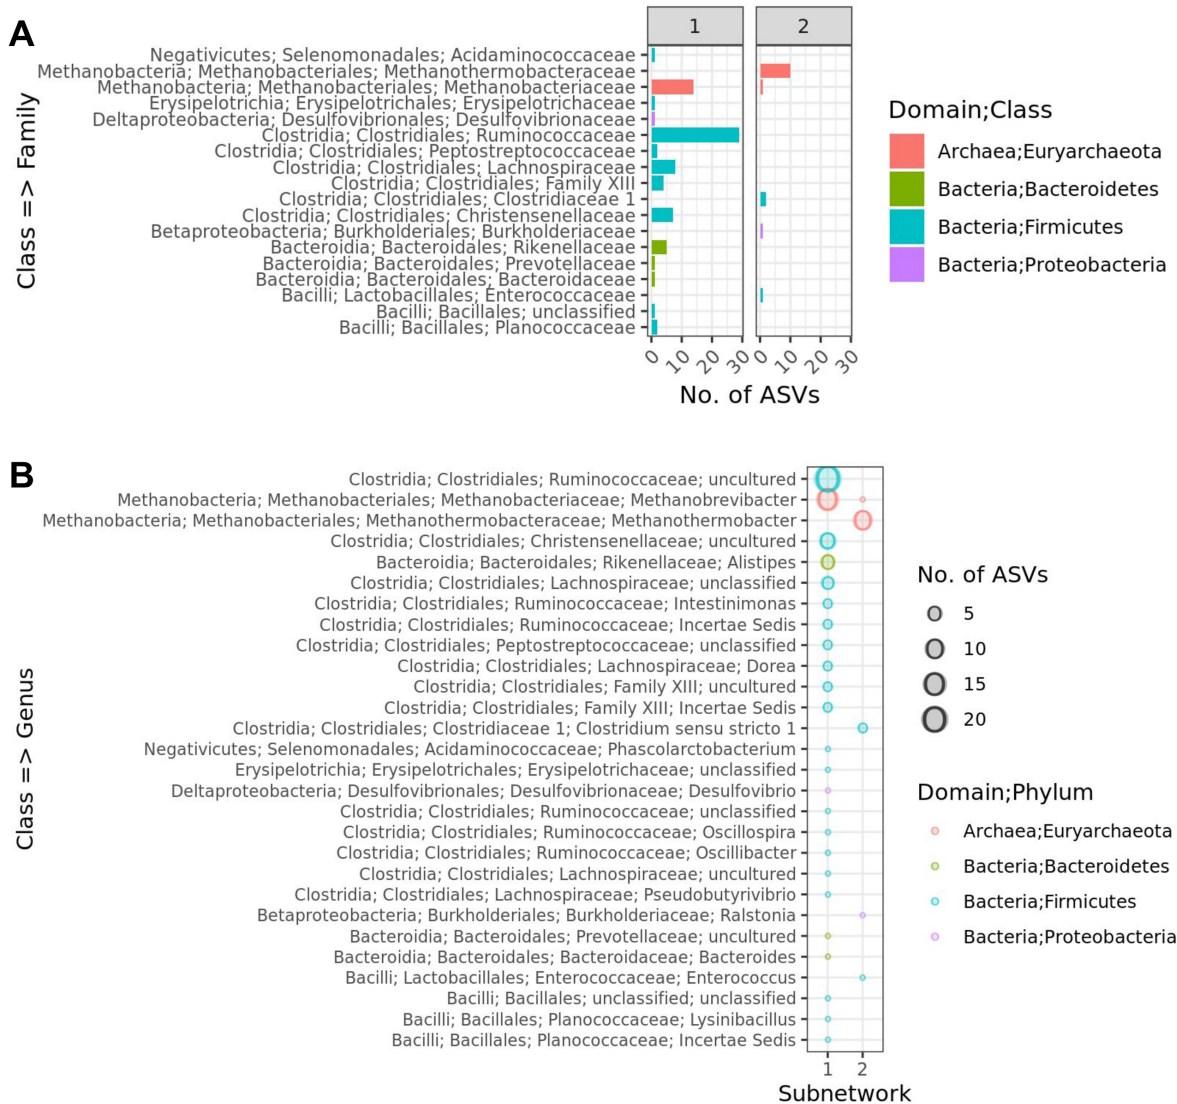

583 **Figure S25.** Taxonomic composition of the 2 sub-networks (Figure 4D) containing archaeal  
 584 ASVs, with the number of ASVs summarized at the A) family and B) genus taxonomic levels.

## 585 Supplemental References

- 586 Bokulich, Nicholas A., Benjamin D. Kaehler, Jai Ram Rideout, Matthew Dillon, Evan Bolyen,  
587 Rob Knight, Gavin A. Huttley, and J. Gregory Caporaso. 2018. "Optimizing Taxonomic  
588 Classification of Marker-Gene Amplicon Sequences with QIIME 2's q2-Feature-Classifer  
589 Plugin." *Microbiome* 6 (1): 90.
- 590 Bonin, Adam S., and David R. Boone. 2006. "The Order Methanobacteriales." In *The*  
591 *Prokaryotes*, edited by Martin Dworkin Professor Dr., Stanley Falkow, Eugene Rosenberg,  
592 Karl-Heinz Schleifer, and Erko Stackebrandt, 231–43. Springer New York.
- 593 Borrel, Guillaume, Jean-François Brugère, Simonetta Gribaldo, Ruth A. Schmitz, and Christine  
594 Moissl-Eichinger. 2020. "The Host-Associated Archaeome." *Nature Reviews. Microbiology*,  
595 July, 1–15.
- 596 Cailliez, Francis. 1983. "The Analytical Solution of the Additive Constant Problem."  
597 *Psychometrika* 48 (2): 305–8.
- 598 Callahan, Benjamin J., Paul J. McMurdie, Michael J. Rosen, Andrew W. Han, Amy Jo A.  
599 Johnson, and Susan P. Holmes. 2016. "DADA2: High-Resolution Sample Inference from  
600 Illumina Amplicon Data." *Nature Methods* 13 (7): 581–83.
- 601 Camacho, Christiam, George Coulouris, Vahram Avagyan, Ning Ma, Jason Papadopoulos,  
602 Kevin Bealer, and Thomas L. Madden. 2009. "BLAST+: Architecture and Applications."  
603 *BMC Bioinformatics* 10: 421.
- 604 Clarke, Andrew, and Mary I. O'Connor. 2014. "Diet and Body Temperature in Mammals and  
605 Birds." *Global Ecology and Biogeography: A Journal of Macroecology* 23 (9): 1000–1008.
- 606 Clarke, Andrew, Peter Rothery, and Nick J. B. Isaac. 2010. "Scaling of Basal Metabolic Rate  
607 with Body Mass and Temperature in Mammals." *The Journal of Animal Ecology* 79 (3):  
608 610–19.
- 609 Clauss, M., M. T. Dittmann, C. Vendl, K. B. Hagen, S. Frei, S. Ortmann, D. W. H. Müller, et al.  
610 2020. "Review: Comparative Methane Production in Mammalian Herbivores." *Animal: An*  
611 *International Journal of Animal Bioscience* 14 (S1): s113–23.
- 612 Collyer, Michael L., and Dean C. Adams. 2018. "RRPP: An R Package for Fitting Linear Models  
613 to High-dimensional Data Using Residual Randomization." Edited by Robert Freckleton.  
614 *Methods in Ecology and Evolution / British Ecological Society* 9 (7): 1772–79.
- 615 Csardi, Gabor, and Tamas Nepusz. 2006. "The Igraph Software Package for Complex Network  
616 Research." *InterJournal*. <http://igraph.org>.
- 617 Goodrich, Julia K., Jillian L. Waters, Angela C. Poole, Jessica L. Sutter, Omry Koren, Ran  
618 Blekhman, Michelle Beaumont, et al. 2014. "Human Genetics Shape the Gut Microbiome."  
619 *Cell* 159 (4): 789–99.
- 620 Goolsby, Eric W., Jorn Bruggeman, and Cécile Ané. 2017. "Rphylopars: Fast Multivariate  
621 Phylogenetic Comparative Methods for Missing Data and Within-species Variation." Edited  
622 by Richard Fitzjohn. *Methods in Ecology and Evolution / British Ecological Society* 8 (1):  
623 22–27.
- 624 Goslee, Sarah C., and Dean L. Urban. 2007. "The Ecodist Package for Dissimilarity-Based  
625 Analysis of Ecological Data." *Jstatssoft* 22 (7): 1–19.
- 626 Griffith, Daniel, Joseph Veech, and Charles Marsh. 2016. "Cooccur: Probabilistic Species  
627 Co-Occurrence Analysis in R." *Journal of Statistical Software, Code Snippets* 69 (2): 1–17.

628 Hackstein, Johannes H. P., and Theo A. van Alen. 1996. "Fecal Methanogens and Vertebrate  
629 Evolution." *Evolution; International Journal of Organic Evolution* 50 (2): 559–72.

630 Hansen, Elizabeth E., Catherine A. Lozupone, Federico E. Rey, Meng Wu, Janaki L. Guruge,  
631 Aneesha Narra, Jonathan Goodfellow, et al. 2011. "Pan-Genome of the Dominant Human  
632 Gut-Associated Archaeon, *Methanobrevibacter Smithii*, Studied in Twins." *Proceedings of  
633 the National Academy of Sciences of the United States of America* 108 Suppl 1  
634 (Supplement 1): 4599–4606.

635 Hsieh, T. C., K. H. Ma, and Anne Chao. 2016. "iNEXT: An R Package for Rarefaction and  
636 Extrapolation of Species Diversity ( Hill Numbers)." Edited by Greg McInerny. *Methods in  
637 Ecology and Evolution / British Ecological Society* 7 (12): 1451–56.

638 Hutchinson, Matthew C., E. Fernando Cagua, Juan A. Balbuena, Daniel B. Stouffer, and  
639 Timothée Poisot. 2017. "Paco: Implementing Procrustean Approach to Cophylogeny in R."  
640 Edited by Richard Fitzjohn. *Methods in Ecology and Evolution / British Ecological Society* 8  
641 (8): 932–40.

642 Katoh, Kazutaka, and Daron M. Standley. 2013. "MAFFT Multiple Sequence Alignment Software  
643 Version 7: Improvements in Performance and Usability." *Molecular Biology and Evolution* 30  
644 (4): 772–80.

645 Keck, François, Frédéric Rimet, Agnès Bouchez, and Alain Franc. 2016. "PhyloSignal: An R  
646 Package to Measure, Test, and Explore the Phylogenetic Signal." *Ecology and Evolution* 6  
647 (9): 2774–80.

648 Koskinen, Kaisa, Manuela R. Pausan, Alexandra K. Perras, Michael Beck, Corinna Bang,  
649 Maximilian Mora, Anke Schilhabel, Ruth Schmitz, and Christine Moissl-Eichinger. 2017.  
650 "First Insights into the Diverse Human Archaeome: Specific Detection of Archaea in the  
651 Gastrointestinal Tract, Lung, and Nose and on Skin." *mBio* 8 (6).  
652 <https://doi.org/10.1128/mBio.00824-17>.

653 Kumar, Sudhir, Glen Stecher, Michael Suleski, and S. Blair Hedges. 2017. "TimeTree: A  
654 Resource for Timelines, Timetrees, and Divergence Times." *Molecular Biology and  
655 Evolution* 34 (7): 1812–19.

656 Lang, Michel, Bernd Bischl, and Dirk Surmann. 2017. "Batchtools: Tools for R to Work on Batch  
657 Systems." *Journal of Open Source Software* 2 (10): 135.

658 Letunic, Ivica, and Peer Bork. 2016. "Interactive Tree of Life (iTOL) v3: An Online Tool for the  
659 Display and Annotation of Phylogenetic and Other Trees." *Nucleic Acids Research* 44 (W1):  
660 W242–45.

661 McNab, Brian K. 1966. "The Metabolism of Fossorial Rodents: A Study of Convergence."  
662 *Ecology* 47 (5): 712–33.

663 Oksanen, Jari, F. Guillaume Blanchet, Roeland Kindt, Pierre Legendre, Peter R. Minchin, R. B.  
664 O'Hara, Gavin L. Simpson, Peter Solymos, M. Henry H. Stevens, and Helene Wagner.  
665 2012. *Vegan: Community Ecology Package* (version 2.0-7).  
666 <http://CRAN.R-project.org/package=vegan>.

667 Palarea-Albaladejo, Javier, and Josep Antoni Martín-Fernández. 2015. "zCompositions — R  
668 Package for Multivariate Imputation of Left-Censored Data under a Compositional  
669 Approach." *Chemometrics and Intelligent Laboratory Systems* 143 (April): 85–96.

670 Paradis, Emmanuel, Julien Claude, and Korbinian Strimmer. 2004. "APE: Analyses of  
671 Phylogenetics and Evolution in R Language." *Bioinformatics* 20 (2): 289–90.



672 Pausan, Manuela R., Cintia Csorba, Georg Singer, Holger Till, Veronika Schöpf, Elisabeth  
673 Santigli, Barbara Klug, Christoph Högenauer, Marcus Blohs, and Christine Moissl-Eichinger.  
674 2019. "Exploring the Archaeome: Detection of Archaeal Signatures in the Human Body."  
675 *Frontiers in Microbiology* 10 (December): 2796.

676 Pedersen, Thomas Lin. 2018a. "Ggraph: An Implementation of Grammar of Graphics for Graphs  
677 and Networks." <https://CRAN.R-project.org/package=ggraph>. 2018b. "Tidygraph: A Tidy API  
678 for Graph Manipulation." <https://CRAN.R-project.org/package=tidygraph>.

679 Pons, Pascal, and Matthieu Latapy. 2005. "Computing Communities in Large Networks Using  
680 Random Walks." In *Computer and Information Sciences - ISCIS 2005*, 284–93. Springer  
681 Berlin Heidelberg.

682 Price, Morgan N., Paramvir S. Dehal, and Adam P. Arkin. 2010. "FastTree 2--Approximately  
683 Maximum-Likelihood Trees for Large Alignments." *PloS One* 5 (3): e9490.

684 Prinzinger, R., A. Preßmar, and E. Schleucher. 1991. "Body Temperature in Birds." *Comparative  
685 Biochemistry and Physiology. Part A, Physiology* 99 (4): 499–506.

686 Pruesse, Elmar, Christian Quast, Katrin Knittel, Bernhard M. Fuchs, Wolfgang Ludwig, Jörg  
687 Peplies, and Frank Oliver Glöckner. 2007. "SILVA: A Comprehensive Online Resource for  
688 Quality Checked and Aligned Ribosomal RNA Sequence Data Compatible with ARB."  
689 *Nucleic Acids Research* 35 (21): 7188–96.

690 Quast, Christian, Elmar Pruesse, Pelin Yilmaz, Jan Gerken, Timmy Schweer, Pablo Yarza, Jörg  
691 Peplies, and Frank Oliver Glöckner. 2013. "The SILVA Ribosomal RNA Gene Database  
692 Project: Improved Data Processing and Web-Based Tools." *Nucleic Acids Research* 41  
693 (Database issue): D590–96.

694 Raymann, Kasie, Andrew H. Moeller, Andrew L. Goodman, and Howard Ochman. 2017.  
695 "Unexplored Archaeal Diversity in the Great Ape Gut Microbiome." *mSphere* 2 (1).  
696 <https://doi.org/10.1128/mSphere.00026-17>.

697 R Core Team. 2020. *R: A Language and Environment for Statistical Computing*. Vienna, Austria:  
698 R Foundation for Statistical Computing.

699 Revell, Liam J. 2010. "Phylogenetic Signal and Linear Regression on Species Data:  
700 Phylogenetic Regression." *Methods in Ecology and Evolution / British Ecological Society* 1  
701 (4): 319–29.

702 Riek, Alexander, and Fritz Geiser. 2013. "Allometry of Thermal Variables in Mammals:  
703 Consequences of Body Size and Phylogeny." *Biological Reviews of the Cambridge  
704 Philosophical Society* 88 (3): 564–72.

705 Schubert, Michael. 2019. "Clustermq Enables Efficient Parallelization of Genomic Analyses."  
706 *Bioinformatics* 35 (21): 4493–95.

707 Sieg, Annette E., Michael P. O'Connor, James N. McNair, Bruce W. Grant, Salvatore J. Agosta,  
708 and Arthur E. Dunham. 2009. "Mammalian Metabolic Allometry: Do Intraspecific Variation,  
709 Phylogeny, and Regression Models Matter?" *The American Naturalist* 174 (5): 720–33.

710 Söllinger, Andrea, and Tim Urich. 2019. "Methylotrophic Methanogens Everywhere - Physiology  
711 and Ecology of Novel Players in Global Methane Cycling." *Biochemical Society  
712 Transactions*, December. <https://doi.org/10.1042/BST20180565>.

713 Takai, K., and K. Horikoshi. 2000. "Rapid Detection and Quantification of Members of the  
714 Archaeal Community by Quantitative PCR Using Fluorogenic Probes." *Applied and  
715 Environmental Microbiology* 66 (11): 5066–72.



716 Teare, Andrew. 2002. "International Species Information System, Medical Animal Records  
717 Keeping System (MedARKS) 2002 Data Extraction."  
718 <https://www.species360.org/about-us/mission-history/>.

719 Thompson, Luke R., Jon G. Sanders, Daniel McDonald, Amnon Amir, Joshua Ladau, Kenneth  
720 J. Locey, Robert J. Prill, et al. 2017. "A Communal Catalogue Reveals Earth's Multiscale  
721 Microbial Diversity." *Nature* 551 (7681): 457–63.

722 Walters, William, Embriette R. Hyde, Donna Berg-Lyons, Gail Ackermann, Greg Humphrey,  
723 Alma Parada, Jack A. Gilbert, et al. 2016. "Improved Bacterial 16S rRNA Gene (V4 and  
724 V4-5) and Fungal Internal Transcribed Spacer Marker Gene Primers for Microbial  
725 Community Surveys." *mSystems* 1 (1). <https://doi.org/10.1128/mSystems.00009-15>.

726 Wickham, Hadley. 2009. *ggplot2: Elegant Graphics for Data Analysis*. 1st ed. 2009. Corr. 3rd  
727 printing 2010 edition. New York: Springer.

728 Youngblut, Nicholas D., Georg H. Reischer, William Walters, Nathalie Schuster, Chris Walzer,  
729 Gabrielle Stalder, Ruth E. Ley, and Andreas H. Farnleitner. 2019. "Host Diet and  
730 Evolutionary History Explain Different Aspects of Gut Microbiome Diversity among  
731 Vertebrate Clades." *Nature Communications* 10 (1): 2200.
